# Supplementary material for: Conformational potential energy surfaces and cationic structure of 3,4-dihydro-2H-pyran by VUV-MATI spectroscopy and Franck–Condon fitting
Source: Royal Society of Chemistry journal article supplement (doi:10.1039/d0cp05193d), 2020-01-01
Supplement: d0cp05193d1.pdf [file d0cp05193d1.pdf]

**Table S1** Raw data for the VUV-MATI spectrum of 34DHP, where the intensity was normalized to that of the 0-0 band.

| VUV photon energy | Intensity | VUV photon energy | Intensity | VUV photon energy | Intensity |
|-------------------|-----------|-------------------|-----------|-------------------|-----------|
| 66727.9           | 0.0003    | 66764.39          | 0.0000    | 66800.79          | 0.0002    |
| 66728.83          | 0.0004    | 66765.32          | -0.0003   | 66801.72          | 0.0000    |
| 66729.77          | 0.0001    | 66766.26          | -0.0003   | 66802.65          | 0.0003    |
| 66730.71          | 0.0004    | 66767.19          | -0.0005   | 66803.58          | 0.0001    |
| 66731.64          | 0.0004    | 66768.13          | -0.0004   | 66804.51          | 0.0004    |
| 66732.58          | 0.0003    | 66769.06          | -0.0002   | 66805.44          | 0.0004    |
| 66733.52          | 0.0003    | 66770             | -0.0003   | 66806.38          | 0.0002    |
| 66734.45          | 0.0001    | 66770.93          | -0.0002   | 66807.31          | 0.0002    |
| 66735.39          | 0.0004    | 66771.86          | -0.0005   | 66808.24          | 0.0002    |
| 66736.33          | 0.0000    | 66772.8           | -0.0001   | 66809.17          | 0.0004    |
| 66737.26          | 0.0001    | 66773.73          | -0.0002   | 66810.1           | 0.0002    |
| 66738.2           | 0.0001    | 66774.67          | -0.0004   | 66811.03          | 0.0003    |
| 66739.14          | 0.0000    | 66775.6           | -0.0001   | 66811.96          | 0.0000    |
| 66740.07          | -0.0004   | 66776.53          | -0.0002   | 66812.9           | 0.0001    |
| 66741.01          | -0.0001   | 66777.47          | -0.0003   | 66813.83          | 0.0001    |
| 66741.94          | -0.0001   | 66778.4           | 0.0002    | 66814.76          | 0.0000    |
| 66742.88          | -0.0001   | 66779.33          | 0.0002    | 66815.69          | 0.0001    |
| 66743.82          | -0.0002   | 66780.27          | -0.0001   | 66816.62          | 0.0002    |
| 66744.75          | -0.0002   | 66781.2           | 0.0001    | 66817.55          | 0.0003    |
| 66745.69          | -0.0002   | 66782.13          | 0.0000    | 66818.48          | -0.0001   |
| 66746.62          | 0.0000    | 66783.07          | -0.0002   | 66819.41          | 0.0000    |
| 66747.56          | -0.0001   | 66784             | -0.0001   | 66820.34          | 0.0000    |
| 66748.49          | -0.0003   | 66784.93          | -0.0002   | 66821.27          | -0.0002   |
| 66749.43          | -0.0001   | 66785.87          | -0.0003   | 66822.2           | -0.0001   |
| 66750.37          | -0.0003   | 66786.8           | 0.0003    | 66823.13          | -0.0001   |
| 66751.3           | -0.0004   | 66787.73          | 0.0001    | 66824.07          | -0.0002   |
| 66752.24          | -0.0003   | 66788.66          | 0.0003    | 66825             | -0.0003   |
| 66753.17          | -0.0002   | 66789.6           | 0.0000    | 66825.93          | 0.0000    |
| 66754.11          | -0.0003   | 66790.53          | 0.0002    | 66826.86          | -0.0001   |
| 66755.04          | -0.0004   | 66791.46          | 0.0000    | 66827.79          | -0.0002   |
| 66755.98          | -0.0002   | 66792.4           | 0.0002    | 66828.72          | -0.0004   |
| 66756.91          | 0.0000    | 66793.33          | 0.0002    | 66829.65          | 0.0000    |
| 66757.85          | -0.0003   | 66794.26          | 0.0000    | 66830.58          | -0.0002   |
| 66758.78          | 0.0001    | 66795.19          | -0.0001   | 66831.51          | -0.0004   |
| 66759.72          | 0.0001    | 66796.13          | 0.0000    | 66832.44          | -0.0003   |
| 66760.65          | -0.0001   | 66797.06          | -0.0001   | 66833.37          | -0.0001   |
| 66761.59          | -0.0003   | 66797.99          | 0.0000    | 66834.3           | -0.0002   |
| 66762.52          | -0.0002   | 66798.92          | -0.0001   | 66835.23          | 0.0000    |
| 66763.46          | -0.0001   | 66799.85          | 0.0003    | 66836.16          | -0.0004   |

Table S1. Continued

| VUV photon energy | Intensity | VUV photon energy | Intensity | VUV photon energy | Intensity |
|-------------------|-----------|-------------------|-----------|-------------------|-----------|
| 66837.08          | -0.0006   | 66873.29          | 0.0003    | 66909.39          | -0.0002   |
| 66838.01          | -0.0006   | 66874.21          | 0.0000    | 66910.32          | -0.0003   |
| 66838.94          | -0.0005   | 66875.14          | 0.0004    | 66911.24          | -0.0004   |
| 66839.87          | -0.0006   | 66876.07          | 0.0001    | 66912.17          | -0.0006   |
| 66840.8           | -0.0002   | 66876.99          | 0.0005    | 66913.09          | -0.0005   |
| 66841.73          | -0.0003   | 66877.92          | 0.0001    | 66914.02          | -0.0001   |
| 66842.66          | -0.0001   | 66878.85          | 0.0001    | 66914.94          | 0.0000    |
| 66843.59          | -0.0004   | 66879.77          | 0.0001    | 66915.86          | 0.0000    |
| 66844.52          | -0.0004   | 66880.7           | 0.0002    | 66916.79          | -0.0001   |
| 66845.45          | -0.0002   | 66881.63          | 0.0004    | 66917.71          | 0.0001    |
| 66846.38          | -0.0001   | 66882.55          | 0.0005    | 66918.64          | -0.0004   |
| 66847.31          | -0.0001   | 66883.48          | 0.0000    | 66919.56          | 0.0000    |
| 66848.23          | 0.0001    | 66884.41          | -0.0001   | 66920.48          | -0.0002   |
| 66849.16          | -0.0002   | 66885.33          | 0.0002    | 66921.41          | -0.0004   |
| 66850.09          | -0.0001   | 66886.26          | 0.0003    | 66922.33          | -0.0002   |
| 66851.02          | -0.0001   | 66887.19          | 0.0005    | 66923.26          | -0.0003   |
| 66851.95          | -0.0002   | 66888.11          | 0.0002    | 66924.18          | -0.0001   |
| 66852.88          | -0.0005   | 66889.04          | 0.0001    | 66925.1           | -0.0003   |
| 66853.81          | -0.0003   | 66889.96          | 0.0005    | 66926.03          | -0.0007   |
| 66854.73          | -0.0001   | 66890.89          | 0.0005    | 66926.95          | -0.0003   |
| 66855.66          | -0.0001   | 66891.82          | 0.0003    | 66927.87          | -0.0002   |
| 66856.59          | -0.0001   | 66892.74          | 0.0002    | 66928.8           | -0.0001   |
| 66857.52          | -0.0002   | 66893.67          | 0.0004    | 66929.72          | -0.0005   |
| 66858.45          | -0.0003   | 66894.59          | 0.0002    | 66930.64          | -0.0006   |
| 66859.37          | 0.0001    | 66895.52          | 0.0003    | 66931.57          | 0.0001    |
| 66860.3           | 0.0000    | 66896.44          | 0.0003    | 66932.49          | -0.0004   |
| 66861.23          | 0.0001    | 66897.37          | 0.0003    | 66933.41          | 0.0000    |
| 66862.16          | 0.0003    | 66898.29          | 0.0003    | 66934.33          | -0.0002   |
| 66863.09          | 0.0003    | 66899.22          | 0.0001    | 66935.26          | -0.0001   |
| 66864.01          | 0.0000    | 66900.14          | 0.0004    | 66936.18          | 0.0000    |
| 66864.94          | 0.0001    | 66901.07          | 0.0002    | 66937.1           | 0.0002    |
| 66865.87          | -0.0003   | 66901.99          | 0.0003    | 66938.03          | 0.0001    |
| 66866.8           | -0.0001   | 66902.92          | -0.0001   | 66938.95          | 0.0003    |
| 66867.72          | 0.0003    | 66903.84          | -0.0001   | 66939.87          | 0.0002    |
| 66868.65          | 0.0003    | 66904.77          | -0.0001   | 66940.79          | 0.0004    |
| 66869.58          | 0.0002    | 66905.69          | 0.0005    | 66941.72          | 0.0004    |
| 66870.51          | 0.0000    | 66906.62          | -0.0001   | 66942.64          | 0.0003    |
| 66871.43          | 0.0001    | 66907.54          | 0.0000    | 66943.56          | 0.0004    |
| 66872.36          | 0.0002    | 66908.47          | 0.0001    | 66944.48          | 0.0006    |

Table S1. Continued

| VUV photon energy | Intensity | VUV photon energy | Intensity | VUV photon energy | Intensity |
|-------------------|-----------|-------------------|-----------|-------------------|-----------|
| 66945.4           | 0.0005    | 66981.32          | -0.0001   | 67017.14          | 0.0003    |
| 66946.33          | 0.0007    | 66982.24          | -0.0001   | 67018.06          | 0.0006    |
| 66947.25          | 0.0002    | 66983.16          | 0.0000    | 67018.97          | 0.0003    |
| 66948.17          | 0.0010    | 66984.08          | 0.0001    | 67019.89          | 0.0004    |
| 66949.09          | 0.0007    | 66985             | -0.0001   | 67020.81          | 0.0005    |
| 66950.01          | 0.0007    | 66985.92          | 0.0001    | 67021.73          | 0.0007    |
| 66950.94          | 0.0007    | 66986.84          | 0.0000    | 67022.64          | 0.0009    |
| 66951.86          | 0.0009    | 66987.76          | -0.0002   | 67023.56          | 0.0007    |
| 66952.78          | 0.0008    | 66988.68          | -0.0004   | 67024.48          | 0.0006    |
| 66953.7           | 0.0006    | 66989.59          | -0.0001   | 67025.39          | 0.0010    |
| 66954.62          | 0.0011    | 66990.51          | 0.0001    | 67026.31          | 0.0007    |
| 66955.54          | 0.0006    | 66991.43          | 0.0000    | 67027.23          | 0.0009    |
| 66956.47          | 0.0007    | 66992.35          | 0.0000    | 67028.14          | 0.0006    |
| 66957.39          | 0.0006    | 66993.27          | -0.0001   | 67029.06          | 0.0007    |
| 66958.31          | 0.0004    | 66994.19          | -0.0004   | 67029.98          | 0.0006    |
| 66959.23          | 0.0006    | 66995.11          | -0.0004   | 67030.89          | 0.0011    |
| 66960.15          | 0.0002    | 66996.03          | -0.0001   | 67031.81          | 0.0007    |
| 66961.07          | 0.0001    | 66996.95          | -0.0001   | 67032.72          | 0.0012    |
| 66961.99          | 0.0000    | 66997.86          | 0.0002    | 67033.64          | 0.0013    |
| 66962.91          | -0.0002   | 66998.78          | 0.0001    | 67034.56          | 0.0009    |
| 66963.83          | 0.0000    | 66999.7           | 0.0002    | 67035.47          | 0.0011    |
| 66964.76          | -0.0002   | 67000.62          | -0.0001   | 67036.39          | 0.0013    |
| 66965.68          | -0.0004   | 67001.54          | -0.0001   | 67037.3           | 0.0010    |
| 66966.6           | -0.0001   | 67002.46          | 0.0003    | 67038.22          | 0.0012    |
| 66967.52          | -0.0003   | 67003.37          | -0.0001   | 67039.14          | 0.0007    |
| 66968.44          | -0.0001   | 67004.29          | 0.0001    | 67040.05          | 0.0012    |
| 66969.36          | -0.0001   | 67005.21          | 0.0002    | 67040.97          | 0.0012    |
| 66970.28          | 0.0002    | 67006.13          | 0.0002    | 67041.88          | 0.0011    |
| 66971.2           | -0.0001   | 67007.05          | 0.0002    | 67042.8           | 0.0013    |
| 66972.12          | -0.0001   | 67007.96          | 0.0003    | 67043.71          | 0.0009    |
| 66973.04          | 0.0000    | 67008.88          | 0.0002    | 67044.63          | 0.0014    |
| 66973.96          | 0.0000    | 67009.8           | 0.0001    | 67045.55          | 0.0012    |
| 66974.88          | 0.0001    | 67010.72          | 0.0003    | 67046.46          | 0.0008    |
| 66975.8           | -0.0001   | 67011.64          | 0.0004    | 67047.38          | 0.0013    |
| 66976.72          | -0.0003   | 67012.55          | 0.0003    | 67048.29          | 0.0015    |
| 66977.64          | 0.0002    | 67013.47          | 0.0005    | 67049.21          | 0.0020    |
| 66978.56          | -0.0002   | 67014.39          | 0.0002    | 67050.12          | 0.0013    |
| 66979.48          | 0.0002    | 67015.31          | 0.0003    | 67051.04          | 0.0020    |
| 66980.4           | -0.0002   | 67016.22          | 0.0003    | 67051.95          | 0.0015    |

Table S1. Continued

| VUV photon energy | Intensity | VUV photon energy | Intensity | VUV photon energy | Intensity |
|-------------------|-----------|-------------------|-----------|-------------------|-----------|
| 67052.87          | 0.0015    | 67088.5           | 0.0001    | 67124.04          | 0.0002    |
| 67053.78          | 0.0014    | 67089.41          | 0.0001    | 67124.95          | 0.0002    |
| 67054.7           | 0.0009    | 67090.32          | 0.0001    | 67125.86          | 0.0004    |
| 67055.61          | 0.0012    | 67091.24          | 0.0002    | 67126.77          | 0.0001    |
| 67056.53          | 0.0004    | 67092.15          | 0.0000    | 67127.68          | 0.0002    |
| 67057.44          | 0.0010    | 67093.06          | 0.0001    | 67128.59          | -0.0001   |
| 67058.35          | 0.0004    | 67093.97          | 0.0000    | 67129.5           | -0.0001   |
| 67059.27          | 0.0005    | 67094.88          | 0.0001    | 67130.4           | -0.0001   |
| 67060.18          | 0.0002    | 67095.8           | -0.0001   | 67131.31          | -0.0003   |
| 67061.1           | 0.0001    | 67096.71          | 0.0002    | 67132.22          | -0.0003   |
| 67062.01          | 0.0001    | 67097.62          | 0.0002    | 67133.13          | -0.0002   |
| 67062.93          | 0.0001    | 67098.53          | 0.0004    | 67134.04          | 0.0000    |
| 67063.84          | 0.0005    | 67099.44          | -0.0002   | 67134.95          | 0.0000    |
| 67064.75          | 0.0003    | 67100.35          | 0.0002    | 67135.86          | 0.0001    |
| 67065.67          | 0.0000    | 67101.27          | 0.0001    | 67136.77          | 0.0004    |
| 67066.58          | 0.0006    | 67102.18          | 0.0000    | 67137.68          | 0.0001    |
| 67067.5           | -0.0002   | 67103.09          | 0.0000    | 67138.59          | 0.0003    |
| 67068.41          | 0.0001    | 67104             | 0.0004    | 67139.5           | 0.0001    |
| 67069.32          | -0.0001   | 67104.91          | 0.0003    | 67140.41          | 0.0001    |
| 67070.24          | -0.0003   | 67105.82          | 0.0001    | 67141.32          | -0.0001   |
| 67071.15          | 0.0001    | 67106.73          | 0.0002    | 67142.22          | -0.0002   |
| 67072.06          | -0.0001   | 67107.65          | 0.0003    | 67143.13          | 0.0001    |
| 67072.98          | -0.0001   | 67108.56          | 0.0004    | 67144.04          | -0.0004   |
| 67073.89          | -0.0002   | 67109.47          | 0.0003    | 67144.95          | -0.0002   |
| 67074.8           | -0.0001   | 67110.38          | 0.0001    | 67145.86          | -0.0002   |
| 67075.72          | -0.0001   | 67111.29          | 0.0003    | 67146.77          | 0.0000    |
| 67076.63          | -0.0002   | 67112.2           | 0.0005    | 67147.68          | 0.0002    |
| 67077.54          | -0.0002   | 67113.11          | 0.0007    | 67148.58          | 0.0003    |
| 67078.46          | -0.0002   | 67114.02          | 0.0005    | 67149.49          | 0.0003    |
| 67079.37          | -0.0002   | 67114.93          | 0.0008    | 67150.4           | 0.0002    |
| 67080.28          | 0.0000    | 67115.84          | 0.0005    | 67151.31          | 0.0003    |
| 67081.2           | 0.0001    | 67116.75          | 0.0007    | 67152.22          | 0.0001    |
| 67082.11          | 0.0001    | 67117.66          | 0.0007    | 67153.13          | 0.0003    |
| 67083.02          | 0.0001    | 67118.57          | 0.0006    | 67154.03          | 0.0003    |
| 67083.94          | 0.0000    | 67119.49          | 0.0007    | 67154.94          | 0.0000    |
| 67084.85          | -0.0001   | 67120.4           | 0.0005    | 67155.85          | -0.0001   |
| 67085.76          | 0.0001    | 67121.31          | 0.0005    | 67156.76          | 0.0004    |
| 67086.67          | 0.0002    | 67122.22          | 0.0000    | 67157.67          | 0.0003    |
| 67087.59          | 0.0002    | 67123.13          | -0.0001   | 67158.57          | 0.0002    |

Table S1. Continued

| VUV photon energy | Intensity | VUV photon energy | Intensity | VUV photon energy | Intensity |
|-------------------|-----------|-------------------|-----------|-------------------|-----------|
| 67159.48          | 0.0004    | 67194.83          | 0.0055    | 67230.09          | 0.9029    |
| 67160.39          | 0.0005    | 67195.74          | 0.0055    | 67230.99          | 0.8119    |
| 67161.3           | 0.0008    | 67196.64          | 0.0058    | 67231.9           | 0.6618    |
| 67162.2           | 0.0005    | 67197.55          | 0.0065    | 67232.8           | 0.5129    |
| 67163.11          | 0.0006    | 67198.45          | 0.0062    | 67233.7           | 0.3854    |
| 67164.02          | 0.0006    | 67199.36          | 0.0062    | 67234.61          | 0.2892    |
| 67164.93          | 0.0004    | 67200.26          | 0.0075    | 67235.51          | 0.1998    |
| 67165.83          | 0.0009    | 67201.17          | 0.0076    | 67236.41          | 0.1430    |
| 67166.74          | 0.0010    | 67202.07          | 0.0064    | 67237.31          | 0.1039    |
| 67167.65          | 0.0007    | 67202.98          | 0.0070    | 67238.21          | 0.0705    |
| 67168.55          | 0.0009    | 67203.88          | 0.0068    | 67239.12          | 0.0518    |
| 67169.46          | 0.0013    | 67204.79          | 0.0068    | 67240.02          | 0.0398    |
| 67170.37          | 0.0009    | 67205.69          | 0.0082    | 67240.92          | 0.0292    |
| 67171.28          | 0.0012    | 67206.6           | 0.0101    | 67241.82          | 0.0190    |
| 67172.18          | 0.0016    | 67207.5           | 0.0116    | 67242.73          | 0.0154    |
| 67173.09          | 0.0014    | 67208.4           | 0.0133    | 67243.63          | 0.0125    |
| 67174             | 0.0013    | 67209.31          | 0.0156    | 67244.53          | 0.0074    |
| 67174.9           | 0.0015    | 67210.21          | 0.0194    | 67245.43          | 0.0047    |
| 67175.81          | 0.0016    | 67211.12          | 0.0210    | 67246.33          | 0.0034    |
| 67176.72          | 0.0017    | 67212.02          | 0.0284    | 67247.24          | 0.0022    |
| 67177.62          | 0.0014    | 67212.93          | 0.0339    | 67248.14          | 0.0025    |
| 67178.53          | 0.0019    | 67213.83          | 0.0427    | 67249.04          | 0.0022    |
| 67179.43          | 0.0016    | 67214.73          | 0.0522    | 67249.94          | 0.0018    |
| 67180.34          | 0.0016    | 67215.64          | 0.0668    | 67250.84          | 0.0005    |
| 67181.25          | 0.0019    | 67216.54          | 0.0829    | 67251.74          | 0.0001    |
| 67182.15          | 0.0019    | 67217.44          | 0.1054    | 67252.64          | 0.0006    |
| 67183.06          | 0.0016    | 67218.35          | 0.1287    | 67253.55          | 0.0021    |
| 67183.96          | 0.0015    | 67219.25          | 0.1610    | 67254.45          | 0.0010    |
| 67184.87          | 0.0018    | 67220.16          | 0.2085    | 67255.35          | 0.0003    |
| 67185.78          | 0.0019    | 67221.06          | 0.2552    | 67256.25          | -0.0002   |
| 67186.68          | 0.0021    | 67221.96          | 0.3440    | 67257.15          | 0.0000    |
| 67187.59          | 0.0019    | 67222.87          | 0.4236    | 67258.05          | 0.0005    |
| 67188.49          | 0.0027    | 67223.77          | 0.5382    | 67258.95          | 0.0014    |
| 67189.4           | 0.0032    | 67224.67          | 0.6382    | 67259.85          | 0.0010    |
| 67190.31          | 0.0030    | 67225.58          | 0.7666    | 67260.75          | 0.0012    |
| 67191.21          | 0.0035    | 67226.48          | 0.8450    | 67261.66          | 0.0000    |
| 67192.12          | 0.0038    | 67227.38          | 0.9173    | 67262.56          | 0.0007    |
| 67193.02          | 0.0044    | 67228.29          | 1.0000    | 67263.46          | 0.0009    |
| 67193.93          | 0.0054    | 67229.19          | 0.9858    | 67264.36          | 0.0009    |

Table S1. Continued

| VUV photon energy | Intensity | VUV photon energy | Intensity | VUV photon energy | Intensity |
|-------------------|-----------|-------------------|-----------|-------------------|-----------|
| 67265.26          | 0.0014    | 67300.33          | -0.0004   | 67335.32          | 0.0013    |
| 67266.16          | 0.0013    | 67301.23          | 0.0009    | 67336.21          | 0.0014    |
| 67267.06          | 0.0010    | 67302.13          | 0.0003    | 67337.11          | 0.0012    |
| 67267.96          | 0.0012    | 67303.03          | -0.0001   | 67338             | 0.0016    |
| 67268.86          | 0.0003    | 67303.92          | 0.0005    | 67338.9           | 0.0017    |
| 67269.76          | 0.0002    | 67304.82          | 0.0004    | 67339.79          | 0.0016    |
| 67270.66          | 0.0004    | 67305.72          | 0.0002    | 67340.69          | 0.0015    |
| 67271.56          | 0.0004    | 67306.62          | 0.0000    | 67341.59          | 0.0020    |
| 67272.46          | 0.0015    | 67307.52          | -0.0003   | 67342.48          | 0.0009    |
| 67273.36          | 0.0011    | 67308.41          | 0.0004    | 67343.38          | 0.0014    |
| 67274.26          | 0.0009    | 67309.31          | 0.0002    | 67344.27          | 0.0011    |
| 67275.16          | -0.0001   | 67310.21          | -0.0004   | 67345.17          | 0.0016    |
| 67276.06          | 0.0003    | 67311.11          | -0.0014   | 67346.06          | 0.0018    |
| 67276.96          | 0.0006    | 67312             | 0.0008    | 67346.96          | 0.0019    |
| 67277.86          | 0.0003    | 67312.9           | 0.0000    | 67347.85          | 0.0024    |
| 67278.76          | 0.0004    | 67313.8           | 0.0000    | 67348.75          | 0.0016    |
| 67279.66          | 0.0014    | 67314.7           | 0.0001    | 67349.64          | 0.0026    |
| 67280.56          | -0.0001   | 67315.59          | -0.0009   | 67350.54          | 0.0025    |
| 67281.46          | -0.0006   | 67316.49          | 0.0004    | 67351.43          | 0.0025    |
| 67282.36          | 0.0001    | 67317.39          | -0.0002   | 67352.33          | 0.0025    |
| 67283.26          | 0.0004    | 67318.28          | 0.0005    | 67353.22          | 0.0024    |
| 67284.16          | 0.0010    | 67319.18          | -0.0001   | 67354.12          | 0.0028    |
| 67285.06          | 0.0013    | 67320.08          | -0.0001   | 67355.01          | 0.0022    |
| 67285.95          | 0.0001    | 67320.97          | 0.0004    | 67355.9           | 0.0027    |
| 67286.85          | -0.0001   | 67321.87          | 0.0001    | 67356.8           | 0.0020    |
| 67287.75          | 0.0000    | 67322.77          | 0.0005    | 67357.69          | 0.0032    |
| 67288.65          | -0.0004   | 67323.66          | -0.0001   | 67358.59          | 0.0030    |
| 67289.55          | 0.0004    | 67324.56          | -0.0003   | 67359.48          | 0.0025    |
| 67290.45          | 0.0011    | 67325.46          | -0.0002   | 67360.38          | 0.0033    |
| 67291.35          | 0.0013    | 67326.35          | -0.0001   | 67361.27          | 0.0035    |
| 67292.25          | 0.0014    | 67327.25          | 0.0009    | 67362.16          | 0.0028    |
| 67293.15          | 0.0002    | 67328.15          | 0.0006    | 67363.06          | 0.0033    |
| 67294.04          | 0.0008    | 67329.04          | 0.0011    | 67363.95          | 0.0027    |
| 67294.94          | 0.0013    | 67329.94          | 0.0006    | 67364.85          | 0.0036    |
| 67295.84          | 0.0010    | 67330.84          | -0.0003   | 67365.74          | 0.0037    |
| 67296.74          | 0.0000    | 67331.73          | 0.0005    | 67366.63          | 0.0029    |
| 67297.64          | 0.0006    | 67332.63          | 0.0003    | 67367.53          | 0.0035    |
| 67298.54          | -0.0003   | 67333.52          | 0.0002    | 67368.42          | 0.0040    |
| 67299.43          | -0.0001   | 67334.42          | 0.0007    | 67369.31          | 0.0041    |

Table S1. Continued

| VUV photon energy | Intensity | VUV photon energy | Intensity | VUV photon energy | Intensity |
|-------------------|-----------|-------------------|-----------|-------------------|-----------|
| 67370.21          | 0.0054    | 67405.01          | 0.0099    | 67439.72          | -0.0007   |
| 67371.1           | 0.0056    | 67405.9           | 0.0081    | 67440.61          | -0.0002   |
| 67371.99          | 0.0068    | 67406.79          | 0.0065    | 67441.5           | 0.0005    |
| 67372.89          | 0.0083    | 67407.68          | 0.0047    | 67442.39          | 0.0000    |
| 67373.78          | 0.0089    | 67408.57          | 0.0043    | 67443.27          | 0.0002    |
| 67374.67          | 0.0100    | 67409.46          | 0.0030    | 67444.16          | -0.0004   |
| 67375.57          | 0.0121    | 67410.35          | 0.0029    | 67445.05          | 0.0003    |
| 67376.46          | 0.0134    | 67411.25          | 0.0019    | 67445.94          | -0.0003   |
| 67377.35          | 0.0174    | 67412.14          | 0.0023    | 67446.83          | 0.0002    |
| 67378.25          | 0.0190    | 67413.03          | 0.0023    | 67447.72          | 0.0000    |
| 67379.14          | 0.0224    | 67413.92          | 0.0013    | 67448.6           | -0.0003   |
| 67380.03          | 0.0268    | 67414.81          | 0.0019    | 67449.49          | 0.0003    |
| 67380.93          | 0.0304    | 67415.7           | 0.0016    | 67450.38          | -0.0004   |
| 67381.82          | 0.0373    | 67416.59          | 0.0020    | 67451.27          | -0.0003   |
| 67382.71          | 0.0453    | 67417.48          | 0.0019    | 67452.16          | 0.0002    |
| 67383.6           | 0.0583    | 67418.37          | 0.0012    | 67453.05          | 0.0005    |
| 67384.5           | 0.0753    | 67419.26          | 0.0012    | 67453.93          | 0.0006    |
| 67385.39          | 0.0968    | 67420.15          | 0.0010    | 67454.82          | 0.0003    |
| 67386.28          | 0.1254    | 67421.04          | 0.0008    | 67455.71          | 0.0001    |
| 67387.17          | 0.1658    | 67421.93          | 0.0011    | 67456.6           | 0.0007    |
| 67388.07          | 0.1951    | 67422.82          | 0.0008    | 67457.48          | 0.0002    |
| 67388.96          | 0.2370    | 67423.71          | 0.0011    | 67458.37          | 0.0002    |
| 67389.85          | 0.2765    | 67424.6           | 0.0015    | 67459.26          | 0.0005    |
| 67390.74          | 0.3095    | 67425.49          | 0.0013    | 67460.15          | -0.0005   |
| 67391.63          | 0.3184    | 67426.38          | 0.0015    | 67461.03          | 0.0002    |
| 67392.53          | 0.3346    | 67427.27          | 0.0015    | 67461.92          | 0.0001    |
| 67393.42          | 0.3263    | 67428.16          | 0.0014    | 67462.81          | 0.0010    |
| 67394.31          | 0.2998    | 67429.05          | 0.0015    | 67463.7           | 0.0009    |
| 67395.2           | 0.2497    | 67429.94          | 0.0012    | 67464.58          | 0.0005    |
| 67396.09          | 0.1895    | 67430.83          | 0.0005    | 67465.47          | 0.0007    |
| 67396.99          | 0.1475    | 67431.72          | 0.0001    | 67466.36          | 0.0014    |
| 67397.88          | 0.1073    | 67432.61          | 0.0011    | 67467.25          | 0.0019    |
| 67398.77          | 0.0816    | 67433.5           | 0.0007    | 67468.13          | 0.0011    |
| 67399.66          | 0.0620    | 67434.38          | 0.0007    | 67469.02          | 0.0015    |
| 67400.55          | 0.0446    | 67435.27          | 0.0008    | 67469.91          | 0.0021    |
| 67401.44          | 0.0327    | 67436.16          | 0.0014    | 67470.79          | 0.0024    |
| 67402.33          | 0.0228    | 67437.05          | 0.0008    | 67471.68          | 0.0027    |
| 67403.23          | 0.0175    | 67437.94          | 0.0003    | 67472.57          | 0.0035    |
| 67404.12          | 0.0131    | 67438.83          | 0.0004    | 67473.45          | 0.0030    |

Table S1. Continued

| VUV photon energy | Intensity | VUV photon energy | Intensity | VUV photon energy | Intensity |
|-------------------|-----------|-------------------|-----------|-------------------|-----------|
| 67474.34          | 0.0038    | 67508.87          | 0.0020    | 67543.31          | 0.0035    |
| 67475.23          | 0.0047    | 67509.75          | 0.0012    | 67544.19          | 0.0035    |
| 67476.11          | 0.0067    | 67510.64          | 0.0011    | 67545.07          | 0.0054    |
| 67477             | 0.0066    | 67511.52          | 0.0010    | 67545.96          | 0.0050    |
| 67477.89          | 0.0073    | 67512.41          | 0.0016    | 67546.84          | 0.0054    |
| 67478.77          | 0.0100    | 67513.29          | 0.0009    | 67547.72          | 0.0069    |
| 67479.66          | 0.0132    | 67514.17          | 0.0015    | 67548.6           | 0.0098    |
| 67480.54          | 0.0147    | 67515.06          | 0.0015    | 67549.48          | 0.0126    |
| 67481.43          | 0.0178    | 67515.94          | 0.0006    | 67550.36          | 0.0144    |
| 67482.32          | 0.0187    | 67516.83          | 0.0005    | 67551.25          | 0.0141    |
| 67483.2           | 0.0219    | 67517.71          | 0.0009    | 67552.13          | 0.0212    |
| 67484.09          | 0.0190    | 67518.59          | 0.0007    | 67553.01          | 0.0276    |
| 67484.97          | 0.0199    | 67519.48          | 0.0009    | 67553.89          | 0.0301    |
| 67485.86          | 0.0194    | 67520.36          | 0.0009    | 67554.77          | 0.0327    |
| 67486.75          | 0.0158    | 67521.24          | 0.0006    | 67555.65          | 0.0267    |
| 67487.63          | 0.0120    | 67522.13          | 0.0007    | 67556.53          | 0.0349    |
| 67488.52          | 0.0091    | 67523.01          | 0.0012    | 67557.41          | 0.0372    |
| 67489.4           | 0.0066    | 67523.89          | 0.0016    | 67558.3           | 0.0342    |
| 67490.29          | 0.0043    | 67524.78          | 0.0011    | 67559.18          | 0.0311    |
| 67491.17          | 0.0020    | 67525.66          | 0.0012    | 67560.06          | 0.0244    |
| 67492.06          | 0.0036    | 67526.54          | 0.0019    | 67560.94          | 0.0189    |
| 67492.94          | 0.0026    | 67527.43          | 0.0013    | 67561.82          | 0.0129    |
| 67493.83          | 0.0019    | 67528.31          | 0.0018    | 67562.7           | 0.0110    |
| 67494.71          | 0.0011    | 67529.19          | 0.0012    | 67563.58          | 0.0068    |
| 67495.6           | 0.0010    | 67530.07          | 0.0009    | 67564.46          | 0.0046    |
| 67496.48          | 0.0018    | 67530.96          | 0.0014    | 67565.34          | 0.0046    |
| 67497.37          | 0.0005    | 67531.84          | 0.0016    | 67566.22          | 0.0032    |
| 67498.25          | 0.0006    | 67532.72          | 0.0021    | 67567.1           | 0.0023    |
| 67499.14          | 0.0003    | 67533.61          | 0.0014    | 67567.98          | 0.0023    |
| 67500.02          | 0.0000    | 67534.49          | 0.0014    | 67568.86          | 0.0013    |
| 67500.91          | 0.0008    | 67535.37          | 0.0016    | 67569.74          | 0.0012    |
| 67501.79          | 0.0005    | 67536.25          | 0.0014    | 67570.62          | 0.0012    |
| 67502.68          | 0.0003    | 67537.14          | -0.0003   | 67571.5           | 0.0015    |
| 67503.56          | 0.0012    | 67538.02          | 0.0019    | 67572.38          | 0.0006    |
| 67504.45          | 0.0012    | 67538.9           | 0.0025    | 67573.26          | 0.0013    |
| 67505.33          | 0.0008    | 67539.78          | 0.0023    | 67574.14          | 0.0015    |
| 67506.22          | 0.0011    | 67540.66          | 0.0016    | 67575.02          | 0.0007    |
| 67507.1           | 0.0012    | 67541.55          | 0.0016    | 67575.9           | 0.0005    |
| 67507.99          | 0.0021    | 67542.43          | 0.0023    | 67576.78          | -0.0001   |



Table S1. Continued

| VUV photon energy | Intensity | VUV photon energy | Intensity | VUV photon energy | Intensity |
|-------------------|-----------|-------------------|-----------|-------------------|-----------|
| 67577.66          | 0.0008    | 67611.93          | 0.0022    | 67646.1           | 0.0120    |
| 67578.54          | 0.0013    | 67612.8           | 0.0019    | 67646.98          | 0.0137    |
| 67579.42          | 0.0018    | 67613.68          | 0.0031    | 67647.85          | 0.0106    |
| 67580.3           | 0.0008    | 67614.56          | 0.0031    | 67648.73          | 0.0072    |
| 67581.18          | 0.0005    | 67615.43          | 0.0034    | 67649.6           | 0.0019    |
| 67582.06          | 0.0006    | 67616.31          | 0.0034    | 67650.48          | 0.0044    |
| 67582.94          | 0.0003    | 67617.19          | 0.0039    | 67651.35          | 0.0042    |
| 67583.82          | 0.0015    | 67618.07          | 0.0045    | 67652.22          | 0.0032    |
| 67584.7           | 0.0013    | 67618.94          | 0.0032    | 67653.1           | 0.0020    |
| 67585.58          | 0.0009    | 67619.82          | 0.0036    | 67653.97          | 0.0027    |
| 67586.46          | 0.0008    | 67620.7           | 0.0079    | 67654.85          | 0.0011    |
| 67587.34          | 0.0009    | 67621.57          | 0.0096    | 67655.72          | 0.0004    |
| 67588.21          | 0.0001    | 67622.45          | 0.0114    | 67656.6           | 0.0009    |
| 67589.09          | 0.0011    | 67623.33          | 0.0145    | 67657.47          | 0.0015    |
| 67589.97          | 0.0017    | 67624.2           | 0.0142    | 67658.35          | 0.0015    |
| 67590.85          | 0.0017    | 67625.08          | 0.0150    | 67659.22          | 0.0010    |
| 67591.73          | 0.0015    | 67625.96          | 0.0242    | 67660.1           | 0.0006    |
| 67592.61          | 0.0018    | 67626.83          | 0.0292    | 67660.97          | 0.0000    |
| 67593.49          | 0.0014    | 67627.71          | 0.0243    | 67661.84          | 0.0009    |
| 67594.37          | 0.0016    | 67628.59          | 0.0490    | 67662.72          | 0.0011    |
| 67595.24          | 0.0013    | 67629.46          | 0.0522    | 67663.59          | 0.0013    |
| 67596.12          | 0.0017    | 67630.34          | 0.0876    | 67664.47          | 0.0013    |
| 67597             | 0.0013    | 67631.21          | 0.1145    | 67665.34          | 0.0003    |
| 67597.88          | 0.0017    | 67632.09          | 0.1265    | 67666.21          | 0.0011    |
| 67598.76          | 0.0010    | 67632.97          | 0.1367    | 67667.09          | 0.0004    |
| 67599.64          | 0.0002    | 67633.84          | 0.1156    | 67667.96          | 0.0003    |
| 67600.51          | 0.0017    | 67634.72          | 0.1748    | 67668.83          | 0.0009    |
| 67601.39          | 0.0021    | 67635.59          | 0.1343    | 67669.71          | 0.0001    |
| 67602.27          | 0.0031    | 67636.47          | 0.1641    | 67670.58          | 0.0015    |
| 67603.15          | 0.0030    | 67637.35          | 0.1621    | 67671.46          | 0.0017    |
| 67604.03          | 0.0019    | 67638.22          | 0.1130    | 67672.33          | 0.0014    |
| 67604.9           | 0.0005    | 67639.1           | 0.1121    | 67673.2           | 0.0014    |
| 67605.78          | 0.0016    | 67639.97          | 0.0905    | 67674.08          | 0.0004    |
| 67606.66          | 0.0021    | 67640.85          | 0.0664    | 67674.95          | 0.0011    |
| 67607.54          | 0.0024    | 67641.72          | 0.0382    | 67675.82          | 0.0018    |
| 67608.42          | 0.0019    | 67642.6           | 0.0271    | 67676.69          | 0.0021    |
| 67609.29          | 0.0008    | 67643.47          | 0.0202    | 67677.57          | 0.0012    |
| 67610.17          | 0.0010    | 67644.35          | 0.0246    | 67678.44          | 0.0014    |
| 67611.05          | 0.0012    | 67645.23          | 0.0186    | 67679.31          | 0.0012    |

Table S1. Continued

| VUV photon energy | Intensity | VUV photon energy | Intensity | VUV photon energy | Intensity |
|-------------------|-----------|-------------------|-----------|-------------------|-----------|
| 67680.19          | 0.0007    | 67711.17          | 0.0486    | 67741.82          | 0.0024    |
| 67681.06          | 0.0008    | 67711.96          | 0.0334    | 67742.6           | 0.0022    |
| 67681.93          | 0.0008    | 67712.75          | 0.0234    | 67743.39          | 0.0013    |
| 67682.81          | 0.0003    | 67713.53          | 0.0168    | 67744.17          | 0.0015    |
| 67683.68          | -0.0001   | 67714.32          | 0.0119    | 67744.96          | 0.0012    |
| 67684.39          | 0.0019    | 67715.11          | 0.0096    | 67745.74          | 0.0010    |
| 67685.18          | 0.0024    | 67715.89          | 0.0075    | 67746.53          | 0.0003    |
| 67685.97          | 0.0033    | 67716.68          | 0.0052    | 67747.31          | 0.0011    |
| 67686.76          | 0.0032    | 67717.47          | 0.0053    | 67748.1           | 0.0008    |
| 67687.55          | 0.0030    | 67718.25          | 0.0053    | 67748.88          | 0.0006    |
| 67688.34          | 0.0030    | 67719.04          | 0.0047    | 67749.66          | 0.0000    |
| 67689.12          | 0.0039    | 67719.82          | 0.0061    | 67750.45          | 0.0003    |
| 67689.91          | 0.0032    | 67720.61          | 0.0065    | 67751.23          | 0.0004    |
| 67690.7           | 0.0039    | 67721.4           | 0.0081    | 67752.02          | 0.0005    |
| 67691.49          | 0.0048    | 67722.18          | 0.0081    | 67752.8           | 0.0007    |
| 67692.28          | 0.0055    | 67722.97          | 0.0101    | 67753.58          | 0.0003    |
| 67693.06          | 0.0064    | 67723.75          | 0.0127    | 67754.37          | 0.0001    |
| 67693.85          | 0.0076    | 67724.54          | 0.0158    | 67755.15          | 0.0005    |
| 67694.64          | 0.0085    | 67725.33          | 0.0185    | 67755.94          | 0.0010    |
| 67695.43          | 0.0113    | 67726.11          | 0.0240    | 67756.72          | 0.0000    |
| 67696.22          | 0.0138    | 67726.9           | 0.0321    | 67757.5           | -0.0002   |
| 67697             | 0.0192    | 67727.68          | 0.0380    | 67758.29          | 0.0007    |
| 67697.79          | 0.0250    | 67728.47          | 0.0439    | 67759.07          | 0.0008    |
| 67698.58          | 0.0332    | 67729.25          | 0.0490    | 67759.86          | 0.0008    |
| 67699.37          | 0.0461    | 67730.04          | 0.0527    | 67760.64          | 0.0003    |
| 67700.15          | 0.0603    | 67730.83          | 0.0535    | 67761.42          | 0.0006    |
| 67700.94          | 0.0856    | 67731.61          | 0.0492    | 67762.21          | 0.0005    |
| 67701.73          | 0.1098    | 67732.4           | 0.0460    | 67762.99          | 0.0002    |
| 67702.52          | 0.1404    | 67733.18          | 0.0388    | 67763.77          | 0.0011    |
| 67703.3           | 0.1629    | 67733.97          | 0.0298    | 67764.56          | 0.0004    |
| 67704.09          | 0.1872    | 67734.75          | 0.0240    | 67765.34          | 0.0011    |
| 67704.88          | 0.2006    | 67735.54          | 0.0185    | 67766.12          | 0.0009    |
| 67705.66          | 0.2060    | 67736.32          | 0.0141    | 67766.91          | 0.0014    |
| 67706.45          | 0.2009    | 67737.11          | 0.0110    | 67767.69          | 0.0014    |
| 67707.24          | 0.1915    | 67737.89          | 0.0074    | 67768.47          | 0.0018    |
| 67708.03          | 0.1734    | 67738.68          | 0.0055    | 67769.26          | 0.0016    |
| 67708.81          | 0.1364    | 67739.46          | 0.0046    | 67770.04          | 0.0014    |
| 67709.6           | 0.1014    | 67740.25          | 0.0038    | 67770.82          | 0.0014    |
| 67710.39          | 0.0708    | 67741.03          | 0.0023    | 67771.6           | 0.0013    |

Table S1. Continued

| VUV photon energy | Intensity | VUV photon energy | Intensity | VUV photon energy | Intensity |
|-------------------|-----------|-------------------|-----------|-------------------|-----------|
| 67772.39          | 0.0003    | 67802.88          | 0.0783    | 67833.3           | 0.0003    |
| 67773.17          | 0.0015    | 67803.66          | 0.0640    | 67834.08          | 0.0002    |
| 67773.95          | 0.0010    | 67804.44          | 0.0437    | 67834.86          | 0.0007    |
| 67774.74          | 0.0016    | 67805.22          | 0.0298    | 67835.63          | 0.0000    |
| 67775.52          | 0.0018    | 67806             | 0.0226    | 67836.41          | 0.0002    |
| 67776.3           | 0.0010    | 67806.78          | 0.0147    | 67837.19          | -0.0004   |
| 67777.08          | 0.0016    | 67807.57          | 0.0105    | 67837.97          | 0.0001    |
| 67777.87          | 0.0021    | 67808.35          | 0.0077    | 67838.75          | 0.0005    |
| 67778.65          | 0.0017    | 67809.13          | 0.0035    | 67839.53          | 0.0006    |
| 67779.43          | 0.0019    | 67809.91          | 0.0037    | 67840.31          | 0.0011    |
| 67780.21          | 0.0021    | 67810.69          | 0.0028    | 67841.09          | 0.0010    |
| 67781             | 0.0034    | 67811.47          | 0.0020    | 67841.86          | 0.0008    |
| 67781.78          | 0.0028    | 67812.25          | 0.0013    | 67842.64          | 0.0012    |
| 67782.56          | 0.0032    | 67813.03          | 0.0008    | 67843.42          | 0.0003    |
| 67783.34          | 0.0030    | 67813.81          | 0.0007    | 67844.2           | 0.0009    |
| 67784.12          | 0.0039    | 67814.59          | 0.0006    | 67844.98          | 0.0011    |
| 67784.91          | 0.0035    | 67815.37          | -0.0006   | 67845.76          | 0.0010    |
| 67785.69          | 0.0033    | 67816.15          | 0.0002    | 67846.53          | 0.0014    |
| 67786.47          | 0.0049    | 67816.93          | 0.0003    | 67847.31          | 0.0015    |
| 67787.25          | 0.0056    | 67817.71          | 0.0001    | 67848.09          | 0.0018    |
| 67788.03          | 0.0072    | 67818.49          | 0.0003    | 67848.87          | 0.0023    |
| 67788.82          | 0.0075    | 67819.27          | -0.0002   | 67849.65          | 0.0020    |
| 67789.6           | 0.0089    | 67820.05          | -0.0001   | 67850.42          | 0.0024    |
| 67790.38          | 0.0112    | 67820.83          | -0.0005   | 67851.2           | 0.0019    |
| 67791.16          | 0.0132    | 67821.61          | 0.0001    | 67851.98          | 0.0025    |
| 67791.94          | 0.0181    | 67822.39          | -0.0004   | 67852.76          | 0.0029    |
| 67792.72          | 0.0204    | 67823.17          | -0.0008   | 67853.53          | 0.0037    |
| 67793.51          | 0.0289    | 67823.95          | 0.0001    | 67854.31          | 0.0037    |
| 67794.29          | 0.0391    | 67824.73          | 0.0000    | 67855.09          | 0.0045    |
| 67795.07          | 0.0518    | 67825.51          | -0.0001   | 67855.87          | 0.0056    |
| 67795.85          | 0.0677    | 67826.29          | 0.0007    | 67856.64          | 0.0059    |
| 67796.63          | 0.0868    | 67827.06          | 0.0005    | 67857.42          | 0.0065    |
| 67797.41          | 0.1029    | 67827.84          | -0.0005   | 67858.2           | 0.0098    |
| 67798.19          | 0.1180    | 67828.62          | 0.0004    | 67858.98          | 0.0133    |
| 67798.98          | 0.1314    | 67829.4           | 0.0001    | 67859.75          | 0.0168    |
| 67799.76          | 0.1377    | 67830.18          | 0.0000    | 67860.53          | 0.0255    |
| 67800.54          | 0.1308    | 67830.96          | 0.0001    | 67861.31          | 0.0339    |
| 67801.32          | 0.1206    | 67831.74          | 0.0004    | 67862.09          | 0.0422    |
| 67802.1           | 0.1006    | 67832.52          | 0.0006    | 67862.86          | 0.0532    |

Table S1. Continued

| VUV photon energy | Intensity | VUV photon energy | Intensity | VUV photon energy | Intensity |
|-------------------|-----------|-------------------|-----------|-------------------|-----------|
| 67863.64          | 0.0672    | 67893.91          | 0.0419    | 67924.1           | 0.0006    |
| 67864.42          | 0.0813    | 67894.68          | 0.0421    | 67924.87          | 0.0008    |
| 67865.19          | 0.0855    | 67895.46          | 0.0370    | 67925.65          | 0.0010    |
| 67865.97          | 0.0903    | 67896.23          | 0.0337    | 67926.42          | 0.0002    |
| 67866.75          | 0.0871    | 67897.01          | 0.0288    | 67927.19          | -0.0003   |
| 67867.52          | 0.0847    | 67897.78          | 0.0216    | 67927.96          | 0.0004    |
| 67868.3           | 0.0760    | 67898.56          | 0.0194    | 67928.74          | -0.0003   |
| 67869.08          | 0.0581    | 67899.33          | 0.0146    | 67929.51          | 0.0003    |
| 67869.85          | 0.0471    | 67900.11          | 0.0144    | 67930.28          | 0.0008    |
| 67870.63          | 0.0353    | 67900.88          | 0.0133    | 67931.06          | 0.0007    |
| 67871.41          | 0.0246    | 67901.66          | 0.0119    | 67931.83          | 0.0007    |
| 67872.18          | 0.0172    | 67902.43          | 0.0110    | 67932.6           | 0.0010    |
| 67872.96          | 0.0115    | 67903.2           | 0.0119    | 67933.37          | 0.0018    |
| 67873.74          | 0.0083    | 67903.98          | 0.0116    | 67934.15          | 0.0015    |
| 67874.51          | 0.0062    | 67904.75          | 0.0115    | 67934.92          | 0.0014    |
| 67875.29          | 0.0048    | 67905.53          | 0.0102    | 67935.69          | 0.0017    |
| 67876.07          | 0.0042    | 67906.3           | 0.0088    | 67936.46          | 0.0014    |
| 67876.84          | 0.0033    | 67907.08          | 0.0084    | 67937.24          | 0.0013    |
| 67877.62          | 0.0026    | 67907.85          | 0.0061    | 67938.01          | 0.0023    |
| 67878.39          | 0.0022    | 67908.63          | 0.0039    | 67938.78          | 0.0034    |
| 67879.17          | 0.0024    | 67909.4           | 0.0036    | 67939.55          | 0.0028    |
| 67879.95          | 0.0024    | 67910.17          | 0.0025    | 67940.33          | 0.0030    |
| 67880.72          | 0.0023    | 67910.95          | 0.0015    | 67941.1           | 0.0041    |
| 67881.5           | 0.0032    | 67911.72          | 0.0008    | 67941.87          | 0.0043    |
| 67882.27          | 0.0037    | 67912.5           | 0.0010    | 67942.64          | 0.0053    |
| 67883.05          | 0.0047    | 67913.27          | 0.0004    | 67943.41          | 0.0058    |
| 67883.83          | 0.0033    | 67914.04          | 0.0005    | 67944.19          | 0.0082    |
| 67884.6           | 0.0059    | 67914.82          | 0.0007    | 67944.96          | 0.0098    |
| 67885.38          | 0.0083    | 67915.59          | 0.0012    | 67945.73          | 0.0134    |
| 67886.15          | 0.0087    | 67916.36          | 0.0009    | 67946.5           | 0.0168    |
| 67886.93          | 0.0126    | 67917.14          | 0.0005    | 67947.27          | 0.0224    |
| 67887.7           | 0.0162    | 67917.91          | 0.0006    | 67948.04          | 0.0324    |
| 67888.48          | 0.0207    | 67918.69          | 0.0002    | 67948.82          | 0.0441    |
| 67889.26          | 0.0239    | 67919.46          | 0.0005    | 67949.59          | 0.0541    |
| 67890.03          | 0.0297    | 67920.23          | 0.0004    | 67950.36          | 0.0674    |
| 67890.81          | 0.0351    | 67921.01          | 0.0007    | 67951.13          | 0.0785    |
| 67891.58          | 0.0380    | 67921.78          | 0.0002    | 67951.9           | 0.0886    |
| 67892.36          | 0.0415    | 67922.55          | 0.0009    | 67952.67          | 0.0904    |
| 67893.13          | 0.0427    | 67923.33          | 0.0004    | 67953.45          | 0.0948    |

Table S1. Continued

| VUV photon energy | Intensity | VUV photon energy | Intensity | VUV photon energy | Intensity |
|-------------------|-----------|-------------------|-----------|-------------------|-----------|
| 67954.22          | 0.0897    | 67984.26          | 0.0033    | 68014.23          | 0.0015    |
| 67954.99          | 0.0813    | 67985.03          | 0.0035    | 68015             | 0.0019    |
| 67955.76          | 0.0713    | 67985.8           | 0.0055    | 68015.76          | 0.0019    |
| 67956.53          | 0.0572    | 67986.57          | 0.0074    | 68016.53          | 0.0018    |
| 67957.3           | 0.0487    | 67987.34          | 0.0086    | 68017.3           | 0.0022    |
| 67958.07          | 0.0396    | 67988.11          | 0.0099    | 68018.07          | 0.0021    |
| 67958.84          | 0.0354    | 67988.88          | 0.0098    | 68018.83          | 0.0021    |
| 67959.61          | 0.0361    | 67989.64          | 0.0082    | 68019.6           | 0.0029    |
| 67960.39          | 0.0367    | 67990.41          | 0.0072    | 68020.37          | 0.0028    |
| 67961.16          | 0.0366    | 67991.18          | 0.0072    | 68021.13          | 0.0035    |
| 67961.93          | 0.0393    | 67991.95          | 0.0079    | 68021.9           | 0.0049    |
| 67962.7           | 0.0431    | 67992.72          | 0.0098    | 68022.67          | 0.0058    |
| 67963.47          | 0.0434    | 67993.49          | 0.0124    | 68023.44          | 0.0065    |
| 67964.24          | 0.0410    | 67994.26          | 0.0162    | 68024.2           | 0.0075    |
| 67965.01          | 0.0374    | 67995.03          | 0.0227    | 68024.97          | 0.0098    |
| 67965.78          | 0.0326    | 67995.79          | 0.0295    | 68025.74          | 0.0112    |
| 67966.55          | 0.0264    | 67996.56          | 0.0408    | 68026.5           | 0.0120    |
| 67967.32          | 0.0201    | 67997.33          | 0.0535    | 68027.27          | 0.0127    |
| 67968.09          | 0.0162    | 67998.1           | 0.0624    | 68028.04          | 0.0133    |
| 67968.86          | 0.0119    | 67998.87          | 0.0671    | 68028.8           | 0.0112    |
| 67969.63          | 0.0091    | 67999.64          | 0.0711    | 68029.57          | 0.0103    |
| 67970.4           | 0.0062    | 68000.41          | 0.0690    | 68030.34          | 0.0087    |
| 67971.17          | 0.0050    | 68001.17          | 0.0637    | 68031.1           | 0.0070    |
| 67971.94          | 0.0034    | 68001.94          | 0.0595    | 68031.87          | 0.0062    |
| 67972.71          | 0.0020    | 68002.71          | 0.0538    | 68032.63          | 0.0047    |
| 67973.48          | 0.0023    | 68003.48          | 0.0450    | 68033.4           | 0.0040    |
| 67974.25          | 0.0005    | 68004.25          | 0.0331    | 68034.17          | 0.0039    |
| 67975.02          | 0.0015    | 68005.02          | 0.0238    | 68034.93          | 0.0038    |
| 67975.79          | 0.0014    | 68005.78          | 0.0177    | 68035.7           | 0.0038    |
| 67976.56          | 0.0009    | 68006.55          | 0.0123    | 68036.47          | 0.0046    |
| 67977.33          | 0.0013    | 68007.32          | 0.0087    | 68037.23          | 0.0055    |
| 67978.1           | 0.0018    | 68008.09          | 0.0074    | 68038             | 0.0058    |
| 67978.87          | 0.0015    | 68008.86          | 0.0048    | 68038.76          | 0.0076    |
| 67979.64          | 0.0016    | 68009.62          | 0.0030    | 68039.53          | 0.0089    |
| 67980.41          | 0.0017    | 68010.39          | 0.0029    | 68040.3           | 0.0112    |
| 67981.18          | 0.0016    | 68011.16          | 0.0025    | 68041.06          | 0.0118    |
| 67981.95          | 0.0021    | 68011.93          | 0.0026    | 68041.83          | 0.0138    |
| 67982.72          | 0.0014    | 68012.69          | 0.0019    | 68042.59          | 0.0138    |
| 67983.49          | 0.0023    | 68013.46          | 0.0016    | 68043.36          | 0.0149    |

Table S1. Continued

| VUV photon energy | Intensity | VUV photon energy | Intensity | VUV photon energy | Intensity |
|-------------------|-----------|-------------------|-----------|-------------------|-----------|
| 68044.12          | 0.0124    | 68073.95          | 0.0089    | 68103.69          | 0.0049    |
| 68044.89          | 0.0118    | 68074.71          | 0.0072    | 68104.46          | 0.0050    |
| 68045.66          | 0.0118    | 68075.47          | 0.0059    | 68105.22          | 0.0068    |
| 68046.42          | 0.0099    | 68076.24          | 0.0047    | 68105.98          | 0.0076    |
| 68047.19          | 0.0106    | 68077             | 0.0040    | 68106.74          | 0.0096    |
| 68047.95          | 0.0098    | 68077.76          | 0.0027    | 68107.5           | 0.0126    |
| 68048.72          | 0.0105    | 68078.53          | 0.0021    | 68108.26          | 0.0168    |
| 68049.48          | 0.0122    | 68079.29          | 0.0018    | 68109.03          | 0.0201    |
| 68050.25          | 0.0128    | 68080.05          | 0.0018    | 68109.79          | 0.0266    |
| 68051.01          | 0.0130    | 68080.82          | 0.0016    | 68110.55          | 0.0325    |
| 68051.78          | 0.0146    | 68081.58          | 0.0011    | 68111.31          | 0.0375    |
| 68052.54          | 0.0156    | 68082.34          | 0.0015    | 68112.07          | 0.0438    |
| 68053.31          | 0.0171    | 68083.11          | 0.0015    | 68112.83          | 0.0475    |
| 68054.07          | 0.0193    | 68083.87          | 0.0014    | 68113.59          | 0.0531    |
| 68054.84          | 0.0212    | 68084.63          | 0.0017    | 68114.36          | 0.0530    |
| 68055.6           | 0.0216    | 68085.4           | 0.0017    | 68115.12          | 0.0549    |
| 68056.37          | 0.0234    | 68086.16          | 0.0011    | 68115.88          | 0.0542    |
| 68057.13          | 0.0262    | 68086.92          | 0.0011    | 68116.64          | 0.0513    |
| 68057.9           | 0.0291    | 68087.69          | 0.0015    | 68117.4           | 0.0467    |
| 68058.66          | 0.0298    | 68088.45          | 0.0013    | 68118.16          | 0.0416    |
| 68059.43          | 0.0321    | 68089.21          | 0.0017    | 68118.92          | 0.0337    |
| 68060.19          | 0.0344    | 68089.97          | 0.0022    | 68119.68          | 0.0287    |
| 68060.96          | 0.0334    | 68090.74          | 0.0022    | 68120.44          | 0.0230    |
| 68061.72          | 0.0341    | 68091.5           | 0.0031    | 68121.2           | 0.0168    |
| 68062.48          | 0.0343    | 68092.26          | 0.0034    | 68121.97          | 0.0142    |
| 68063.25          | 0.0347    | 68093.02          | 0.0044    | 68122.73          | 0.0109    |
| 68064.01          | 0.0330    | 68093.79          | 0.0040    | 68123.49          | 0.0084    |
| 68064.78          | 0.0318    | 68094.55          | 0.0051    | 68124.25          | 0.0071    |
| 68065.54          | 0.0269    | 68095.31          | 0.0057    | 68125.01          | 0.0079    |
| 68066.31          | 0.0236    | 68096.07          | 0.0049    | 68125.77          | 0.0067    |
| 68067.07          | 0.0213    | 68096.84          | 0.0049    | 68126.53          | 0.0071    |
| 68067.83          | 0.0153    | 68097.6           | 0.0052    | 68127.29          | 0.0070    |
| 68068.6           | 0.0142    | 68098.36          | 0.0043    | 68128.05          | 0.0075    |
| 68069.36          | 0.0126    | 68099.12          | 0.0047    | 68128.81          | 0.0080    |
| 68070.13          | 0.0110    | 68099.88          | 0.0044    | 68129.57          | 0.0073    |
| 68070.89          | 0.0112    | 68100.65          | 0.0040    | 68130.33          | 0.0072    |
| 68071.65          | 0.0098    | 68101.41          | 0.0031    | 68131.09          | 0.0078    |
| 68072.42          | 0.0099    | 68102.17          | 0.0043    | 68131.85          | 0.0079    |
| 68073.18          | 0.0097    | 68102.93          | 0.0039    | 68132.61          | 0.0076    |

Table S1. Continued

| VUV photon energy | Intensity | VUV photon energy | Intensity | VUV photon energy | Intensity |
|-------------------|-----------|-------------------|-----------|-------------------|-----------|
| 68133.37          | 0.0086    | 68162.37          | 0.0316    | 68191.88          | 0.0042    |
| 68134.13          | 0.0107    | 68163.13          | 0.0327    | 68192.63          | 0.0042    |
| 68134.89          | 0.0104    | 68163.88          | 0.0321    | 68193.39          | 0.0035    |
| 68135.65          | 0.0117    | 68164.64          | 0.0299    | 68194.15          | 0.0030    |
| 68136.41          | 0.0124    | 68165.4           | 0.0274    | 68194.9           | 0.0028    |
| 68137.17          | 0.0112    | 68166.16          | 0.0236    | 68195.66          | 0.0031    |
| 68137.93          | 0.0107    | 68166.91          | 0.0196    | 68196.41          | 0.0035    |
| 68138.69          | 0.0105    | 68167.67          | 0.0147    | 68197.17          | 0.0036    |
| 68139.45          | 0.0082    | 68168.43          | 0.0109    | 68197.92          | 0.0041    |
| 68140.21          | 0.0080    | 68169.19          | 0.0090    | 68198.68          | 0.0048    |
| 68140.97          | 0.0060    | 68169.94          | 0.0071    | 68199.43          | 0.0050    |
| 68141.73          | 0.0058    | 68170.7           | 0.0056    | 68200.19          | 0.0062    |
| 68142.49          | 0.0049    | 68171.46          | 0.0055    | 68200.94          | 0.0075    |
| 68143.25          | 0.0047    | 68172.21          | 0.0046    | 68201.7           | 0.0093    |
| 68144.01          | 0.0043    | 68172.97          | 0.0046    | 68202.46          | 0.0122    |
| 68144.76          | 0.0045    | 68173.73          | 0.0050    | 68203.21          | 0.0162    |
| 68145.52          | 0.0034    | 68174.48          | 0.0062    | 68203.97          | 0.0210    |
| 68145.69          | 0.0033    | 68175.24          | 0.0076    | 68204.72          | 0.0249    |
| 68146.45          | 0.0034    | 68176             | 0.0096    | 68205.48          | 0.0313    |
| 68147.21          | 0.0035    | 68176.75          | 0.0122    | 68206.23          | 0.0343    |
| 68147.97          | 0.0031    | 68177.51          | 0.0163    | 68206.98          | 0.0375    |
| 68148.72          | 0.0037    | 68178.27          | 0.0199    | 68207.74          | 0.0404    |
| 68149.48          | 0.0044    | 68179.02          | 0.0234    | 68208.49          | 0.0409    |
| 68150.24          | 0.0047    | 68179.78          | 0.0270    | 68209.25          | 0.0388    |
| 68151             | 0.0047    | 68180.54          | 0.0303    | 68210             | 0.0346    |
| 68151.76          | 0.0052    | 68181.29          | 0.0325    | 68210.76          | 0.0308    |
| 68152.52          | 0.0058    | 68182.05          | 0.0318    | 68211.51          | 0.0264    |
| 68153.27          | 0.0061    | 68182.81          | 0.0325    | 68212.27          | 0.0239    |
| 68154.03          | 0.0064    | 68183.56          | 0.0295    | 68213.02          | 0.0210    |
| 68154.79          | 0.0074    | 68184.32          | 0.0262    | 68213.78          | 0.0206    |
| 68155.55          | 0.0087    | 68185.08          | 0.0223    | 68214.53          | 0.0180    |
| 68156.31          | 0.0098    | 68185.83          | 0.0197    | 68215.28          | 0.0195    |
| 68157.06          | 0.0107    | 68186.59          | 0.0152    | 68216.04          | 0.0220    |
| 68157.82          | 0.0125    | 68187.34          | 0.0128    | 68216.79          | 0.0256    |
| 68158.58          | 0.0151    | 68188.1           | 0.0090    | 68217.55          | 0.0302    |
| 68159.34          | 0.0174    | 68188.86          | 0.0081    | 68218.3           | 0.0343    |
| 68160.1           | 0.0220    | 68189.61          | 0.0058    | 68219.06          | 0.0425    |
| 68160.85          | 0.0254    | 68190.37          | 0.0054    | 68219.81          | 0.0473    |
| 68161.61          | 0.0296    | 68191.12          | 0.0045    | 68220.56          | 0.0521    |

Table S1. Continued

| VUV photon energy | Intensity | VUV photon energy | Intensity | VUV photon energy | Intensity |
|-------------------|-----------|-------------------|-----------|-------------------|-----------|
| 68221.32          | 0.0579    | 68250.68          | 0.0026    | 68279.98          | 0.0160    |
| 68222.07          | 0.0573    | 68251.44          | 0.0030    | 68280.73          | 0.0126    |
| 68222.83          | 0.0579    | 68252.19          | 0.0037    | 68281.48          | 0.0111    |
| 68223.58          | 0.0563    | 68252.94          | 0.0039    | 68282.23          | 0.0089    |
| 68224.33          | 0.0523    | 68253.69          | 0.0046    | 68282.98          | 0.0070    |
| 68225.09          | 0.0454    | 68254.44          | 0.0056    | 68283.73          | 0.0059    |
| 68225.84          | 0.0378    | 68255.2           | 0.0054    | 68284.48          | 0.0049    |
| 68226.59          | 0.0339    | 68255.95          | 0.0054    | 68285.23          | 0.0037    |
| 68227.35          | 0.0276    | 68256.7           | 0.0056    | 68285.98          | 0.0031    |
| 68228.1           | 0.0236    | 68257.45          | 0.0053    | 68286.73          | 0.0025    |
| 68228.85          | 0.0201    | 68258.2           | 0.0055    | 68287.48          | 0.0021    |
| 68229.61          | 0.0190    | 68258.95          | 0.0048    | 68288.23          | 0.0022    |
| 68230.36          | 0.0175    | 68259.71          | 0.0040    | 68288.98          | 0.0023    |
| 68231.11          | 0.0156    | 68260.46          | 0.0039    | 68289.73          | 0.0022    |
| 68231.87          | 0.0125    | 68261.21          | 0.0033    | 68290.48          | 0.0017    |
| 68232.62          | 0.0113    | 68261.96          | 0.0036    | 68291.23          | 0.0024    |
| 68233.37          | 0.0091    | 68262.71          | 0.0030    | 68291.98          | 0.0030    |
| 68234.13          | 0.0078    | 68263.46          | 0.0038    | 68292.73          | 0.0036    |
| 68234.88          | 0.0066    | 68264.21          | 0.0036    | 68293.48          | 0.0042    |
| 68235.63          | 0.0051    | 68264.97          | 0.0040    | 68294.23          | 0.0039    |
| 68236.39          | 0.0053    | 68265.72          | 0.0060    | 68294.98          | 0.0055    |
| 68237.14          | 0.0041    | 68266.47          | 0.0067    | 68295.72          | 0.0060    |
| 68237.89          | 0.0039    | 68267.22          | 0.0078    | 68296.47          | 0.0084    |
| 68238.65          | 0.0034    | 68267.97          | 0.0108    | 68297.22          | 0.0098    |
| 68239.4           | 0.0030    | 68268.72          | 0.0128    | 68297.97          | 0.0101    |
| 68240.15          | 0.0031    | 68269.47          | 0.0168    | 68298.72          | 0.0118    |
| 68240.9           | 0.0029    | 68270.22          | 0.0208    | 68299.47          | 0.0121    |
| 68241.66          | 0.0027    | 68270.97          | 0.0237    | 68300.22          | 0.0129    |
| 68242.41          | 0.0020    | 68271.72          | 0.0303    | 68300.97          | 0.0136    |
| 68243.16          | 0.0021    | 68272.48          | 0.0329    | 68301.72          | 0.0121    |
| 68243.91          | 0.0017    | 68273.23          | 0.0345    | 68302.47          | 0.0113    |
| 68244.67          | 0.0014    | 68273.98          | 0.0346    | 68303.22          | 0.0100    |
| 68245.42          | 0.0014    | 68274.73          | 0.0343    | 68303.96          | 0.0085    |
| 68246.17          | 0.0015    | 68275.48          | 0.0335    | 68304.71          | 0.0068    |
| 68246.92          | 0.0014    | 68276.23          | 0.0322    | 68305.46          | 0.0055    |
| 68247.68          | 0.0015    | 68276.98          | 0.0276    | 68306.21          | 0.0056    |
| 68248.43          | 0.0017    | 68277.73          | 0.0239    | 68306.96          | 0.0045    |
| 68249.18          | 0.0020    | 68278.48          | 0.0210    | 68307.71          | 0.0044    |
| 68249.93          | 0.0021    | 68279.23          | 0.0177    | 68308.46          | 0.0039    |



Table S1. Continued

| VUV photon energy | Intensity | VUV photon energy | Intensity | VUV photon energy | Intensity |
|-------------------|-----------|-------------------|-----------|-------------------|-----------|
| 68309.2           | 0.0042    | 68338.36          | 0.0174    | 68367.44          | 0.0177    |
| 68309.95          | 0.0045    | 68339.1           | 0.0189    | 68368.18          | 0.0195    |
| 68310.7           | 0.0040    | 68339.85          | 0.0192    | 68368.93          | 0.0197    |
| 68311.45          | 0.0041    | 68340.6           | 0.0213    | 68369.67          | 0.0202    |
| 68312.2           | 0.0047    | 68341.34          | 0.0215    | 68370.42          | 0.0203    |
| 68312.95          | 0.0043    | 68342.09          | 0.0208    | 68371.16          | 0.0184    |
| 68313.69          | 0.0049    | 68342.84          | 0.0197    | 68371.91          | 0.0174    |
| 68314.44          | 0.0044    | 68343.58          | 0.0183    | 68372.65          | 0.0143    |
| 68315.19          | 0.0042    | 68344.33          | 0.0176    | 68373.4           | 0.0123    |
| 68315.94          | 0.0039    | 68345.07          | 0.0161    | 68374.14          | 0.0113    |
| 68316.69          | 0.0048    | 68345.82          | 0.0147    | 68374.89          | 0.0101    |
| 68317.43          | 0.0045    | 68346.57          | 0.0142    | 68375.63          | 0.0097    |
| 68318.18          | 0.0052    | 68347.31          | 0.0140    | 68376.37          | 0.0109    |
| 68318.93          | 0.0049    | 68348.06          | 0.0129    | 68377.12          | 0.0102    |
| 68319.68          | 0.0044    | 68348.81          | 0.0120    | 68377.86          | 0.0118    |
| 68320.43          | 0.0046    | 68349.55          | 0.0119    | 68378.61          | 0.0132    |
| 68321.17          | 0.0049    | 68350.3           | 0.0107    | 68379.35          | 0.0150    |
| 68321.92          | 0.0048    | 68351.04          | 0.0094    | 68380.09          | 0.0171    |
| 68322.67          | 0.0054    | 68351.79          | 0.0080    | 68380.84          | 0.0193    |
| 68323.42          | 0.0051    | 68352.53          | 0.0070    | 68381.58          | 0.0197    |
| 68324.16          | 0.0051    | 68353.28          | 0.0063    | 68382.33          | 0.0209    |
| 68324.91          | 0.0060    | 68354.03          | 0.0065    | 68383.07          | 0.0223    |
| 68325.66          | 0.0066    | 68354.77          | 0.0064    | 68383.81          | 0.0198    |
| 68326.41          | 0.0070    | 68355.52          | 0.0066    | 68384.56          | 0.0182    |
| 68327.15          | 0.0067    | 68356.26          | 0.0086    | 68385.3           | 0.0175    |
| 68327.9           | 0.0077    | 68357.01          | 0.0091    | 68386.04          | 0.0153    |
| 68328.65          | 0.0069    | 68357.75          | 0.0104    | 68386.79          | 0.0130    |
| 68329.39          | 0.0060    | 68358.5           | 0.0114    | 68387.53          | 0.0119    |
| 68330.14          | 0.0059    | 68359.24          | 0.0140    | 68388.28          | 0.0119    |
| 68330.89          | 0.0060    | 68359.99          | 0.0138    | 68389.02          | 0.0109    |
| 68331.64          | 0.0050    | 68360.73          | 0.0148    | 68389.76          | 0.0095    |
| 68332.38          | 0.0055    | 68361.48          | 0.0147    | 68390.51          | 0.0098    |
| 68333.13          | 0.0056    | 68362.22          | 0.0150    | 68391.25          | 0.0102    |
| 68333.88          | 0.0056    | 68362.97          | 0.0132    | 68391.99          | 0.0101    |
| 68334.62          | 0.0070    | 68363.71          | 0.0139    | 68392.74          | 0.0111    |
| 68335.37          | 0.0084    | 68364.46          | 0.0141    | 68393.48          | 0.0109    |
| 68336.12          | 0.0098    | 68365.2           | 0.0150    | 68394.22          | 0.0099    |
| 68336.86          | 0.0126    | 68365.95          | 0.0151    | 68394.97          | 0.0102    |
| 68337.61          | 0.0149    | 68366.69          | 0.0158    | 68395.71          | 0.0093    |

Table S1. Continued

| VUV photon energy | Intensity | VUV photon energy | Intensity | VUV photon energy | Intensity |
|-------------------|-----------|-------------------|-----------|-------------------|-----------|
| 68396.45          | 0.0087    | 68425.39          | 0.0089    | 68454.26          | 0.0369    |
| 68397.19          | 0.0094    | 68426.13          | 0.0107    | 68455             | 0.0403    |
| 68397.94          | 0.0089    | 68426.88          | 0.0124    | 68455.74          | 0.0398    |
| 68398.68          | 0.0089    | 68427.62          | 0.0151    | 68456.48          | 0.0382    |
| 68399.42          | 0.0093    | 68428.36          | 0.0162    | 68457.22          | 0.0354    |
| 68400.17          | 0.0095    | 68429.1           | 0.0180    | 68457.96          | 0.0305    |
| 68400.91          | 0.0113    | 68429.84          | 0.0186    | 68458.7           | 0.0274    |
| 68401.65          | 0.0134    | 68430.58          | 0.0187    | 68459.44          | 0.0214    |
| 68402.39          | 0.0164    | 68431.32          | 0.0197    | 68460.18          | 0.0184    |
| 68403.14          | 0.0203    | 68432.06          | 0.0192    | 68460.92          | 0.0160    |
| 68403.88          | 0.0214    | 68432.8           | 0.0184    | 68461.66          | 0.0168    |
| 68404.62          | 0.0218    | 68433.54          | 0.0167    | 68462.4           | 0.0155    |
| 68405.36          | 0.0220    | 68434.28          | 0.0159    | 68463.13          | 0.0156    |
| 68406.11          | 0.0203    | 68435.02          | 0.0142    | 68463.87          | 0.0161    |
| 68406.85          | 0.0216    | 68435.77          | 0.0148    | 68464.61          | 0.0173    |
| 68407.59          | 0.0201    | 68436.51          | 0.0143    | 68465.35          | 0.0162    |
| 68408.33          | 0.0187    | 68437.25          | 0.0127    | 68466.09          | 0.0163    |
| 68409.08          | 0.0157    | 68437.99          | 0.0117    | 68466.83          | 0.0173    |
| 68409.82          | 0.0127    | 68438.73          | 0.0113    | 68467.57          | 0.0160    |
| 68410.56          | 0.0098    | 68439.47          | 0.0098    | 68468.31          | 0.0168    |
| 68411.3           | 0.0080    | 68440.21          | 0.0089    | 68469.04          | 0.0183    |
| 68412.04          | 0.0067    | 68440.95          | 0.0082    | 68469.78          | 0.0191    |
| 68412.79          | 0.0057    | 68441.69          | 0.0075    | 68470.52          | 0.0216    |
| 68413.53          | 0.0045    | 68442.43          | 0.0068    | 68471.26          | 0.0237    |
| 68414.27          | 0.0048    | 68443.17          | 0.0060    | 68472             | 0.0265    |
| 68415.01          | 0.0042    | 68443.91          | 0.0060    | 68472.74          | 0.0303    |
| 68415.75          | 0.0043    | 68444.65          | 0.0055    | 68473.47          | 0.0317    |
| 68416.5           | 0.0034    | 68445.39          | 0.0057    | 68474.21          | 0.0305    |
| 68417.24          | 0.0037    | 68446.13          | 0.0068    | 68474.95          | 0.0313    |
| 68417.98          | 0.0031    | 68446.87          | 0.0057    | 68475.69          | 0.0316    |
| 68418.72          | 0.0030    | 68447.61          | 0.0072    | 68476.43          | 0.0288    |
| 68419.46          | 0.0032    | 68448.35          | 0.0095    | 68477.16          | 0.0287    |
| 68420.2           | 0.0037    | 68449.09          | 0.0113    | 68477.9           | 0.0261    |
| 68420.95          | 0.0036    | 68449.83          | 0.0141    | 68478.64          | 0.0233    |
| 68421.69          | 0.0035    | 68450.57          | 0.0187    | 68479.38          | 0.0187    |
| 68422.43          | 0.0043    | 68451.31          | 0.0225    | 68480.12          | 0.0143    |
| 68423.17          | 0.0048    | 68452.05          | 0.0262    | 68480.85          | 0.0124    |
| 68423.91          | 0.0052    | 68452.79          | 0.0309    | 68481.59          | 0.0099    |
| 68424.65          | 0.0068    | 68453.53          | 0.0348    | 68482.33          | 0.0081    |

Table S1. Continued

| VUV photon energy | Intensity | VUV photon energy | Intensity | VUV photon energy | Intensity |
|-------------------|-----------|-------------------|-----------|-------------------|-----------|
| 68483.07          | 0.0076    | 68511.8           | 0.0077    | 68540.46          | 0.1257    |
| 68483.8           | 0.0065    | 68512.53          | 0.0082    | 68541.2           | 0.0999    |
| 68484.54          | 0.0059    | 68513.27          | 0.0078    | 68541.93          | 0.0789    |
| 68485.28          | 0.0055    | 68514.01          | 0.0083    | 68542.66          | 0.0619    |
| 68486.02          | 0.0049    | 68514.74          | 0.0080    | 68543.4           | 0.0459    |
| 68486.75          | 0.0044    | 68515.48          | 0.0086    | 68544.13          | 0.0368    |
| 68487.49          | 0.0046    | 68516.21          | 0.0081    | 68544.87          | 0.0289    |
| 68488.23          | 0.0049    | 68516.95          | 0.0083    | 68545.6           | 0.0240    |
| 68488.97          | 0.0051    | 68517.68          | 0.0095    | 68546.33          | 0.0225    |
| 68489.7           | 0.0049    | 68518.42          | 0.0100    | 68547.07          | 0.0183    |
| 68490.44          | 0.0048    | 68519.16          | 0.0114    | 68547.8           | 0.0170    |
| 68491.18          | 0.0044    | 68519.89          | 0.0119    | 68548.53          | 0.0167    |
| 68491.91          | 0.0044    | 68520.63          | 0.0146    | 68549.27          | 0.0154    |
| 68492.65          | 0.0046    | 68521.36          | 0.0160    | 68550             | 0.0137    |
| 68493.39          | 0.0037    | 68522.1           | 0.0190    | 68550.73          | 0.0130    |
| 68494.13          | 0.0043    | 68522.83          | 0.0213    | 68551.47          | 0.0136    |
| 68494.86          | 0.0050    | 68523.57          | 0.0233    | 68552.2           | 0.0135    |
| 68495.6           | 0.0064    | 68524.3           | 0.0247    | 68552.93          | 0.0142    |
| 68496.34          | 0.0061    | 68525.04          | 0.0267    | 68553.67          | 0.0151    |
| 68497.07          | 0.0065    | 68525.77          | 0.0288    | 68554.4           | 0.0180    |
| 68497.81          | 0.0067    | 68526.51          | 0.0310    | 68555.13          | 0.0198    |
| 68498.55          | 0.0075    | 68527.24          | 0.0335    | 68555.87          | 0.0232    |
| 68499.28          | 0.0085    | 68527.98          | 0.0368    | 68556.6           | 0.0269    |
| 68500.02          | 0.0079    | 68528.71          | 0.0442    | 68557.33          | 0.0312    |
| 68500.76          | 0.0079    | 68529.45          | 0.0521    | 68558.07          | 0.0358    |
| 68501.49          | 0.0084    | 68530.18          | 0.0621    | 68558.8           | 0.0408    |
| 68502.23          | 0.0083    | 68530.92          | 0.0815    | 68559.53          | 0.0434    |
| 68502.97          | 0.0081    | 68531.65          | 0.1034    | 68560.27          | 0.0501    |
| 68503.7           | 0.0083    | 68532.38          | 0.1291    | 68561             | 0.0542    |
| 68504.44          | 0.0079    | 68533.12          | 0.1593    | 68561.73          | 0.0569    |
| 68505.17          | 0.0072    | 68533.85          | 0.1853    | 68562.46          | 0.0582    |
| 68505.91          | 0.0070    | 68534.59          | 0.2057    | 68563.2           | 0.0611    |
| 68506.65          | 0.0071    | 68535.32          | 0.2198    | 68563.93          | 0.0580    |
| 68507.38          | 0.0072    | 68536.06          | 0.2325    | 68564.66          | 0.0590    |
| 68508.12          | 0.0073    | 68536.79          | 0.2295    | 68565.39          | 0.0569    |
| 68508.86          | 0.0071    | 68537.53          | 0.2179    | 68566.13          | 0.0521    |
| 68509.59          | 0.0073    | 68538.26          | 0.2004    | 68566.86          | 0.0529    |
| 68510.33          | 0.0078    | 68538.99          | 0.1784    | 68567.59          | 0.0482    |
| 68511.06          | 0.0075    | 68539.73          | 0.1475    | 68568.32          | 0.0457    |

Table S1. Continued

| VUV photon energy | Intensity | VUV photon energy | Intensity | VUV photon energy | Intensity |
|-------------------|-----------|-------------------|-----------|-------------------|-----------|
| 68569.06          | 0.0400    | 68597.58          | 0.0240    | 68626.04          | 0.0196    |
| 68569.79          | 0.0367    | 68598.31          | 0.0221    | 68626.77          | 0.0210    |
| 68570.52          | 0.0317    | 68599.04          | 0.0193    | 68627.5           | 0.0210    |
| 68571.25          | 0.0294    | 68599.77          | 0.0185    | 68628.23          | 0.0227    |
| 68571.99          | 0.0288    | 68600.5           | 0.0152    | 68628.95          | 0.0209    |
| 68572.72          | 0.0247    | 68601.23          | 0.0142    | 68629.68          | 0.0203    |
| 68573.45          | 0.0260    | 68601.96          | 0.0108    | 68630.41          | 0.0201    |
| 68574.18          | 0.0253    | 68602.69          | 0.0097    | 68631.14          | 0.0184    |
| 68574.91          | 0.0272    | 68603.42          | 0.0080    | 68631.87          | 0.0176    |
| 68575.65          | 0.0287    | 68604.16          | 0.0071    | 68632.6           | 0.0169    |
| 68576.38          | 0.0329    | 68604.89          | 0.0064    | 68633.32          | 0.0167    |
| 68577.11          | 0.0384    | 68605.62          | 0.0062    | 68634.05          | 0.0168    |
| 68577.84          | 0.0444    | 68606.35          | 0.0060    | 68634.78          | 0.0170    |
| 68578.57          | 0.0510    | 68607.08          | 0.0058    | 68635.51          | 0.0155    |
| 68579.3           | 0.0571    | 68607.81          | 0.0052    | 68636.24          | 0.0160    |
| 68580.04          | 0.0622    | 68608.54          | 0.0062    | 68636.97          | 0.0149    |
| 68580.77          | 0.0647    | 68609.27          | 0.0069    | 68637.69          | 0.0137    |
| 68581.5           | 0.0680    | 68609.99          | 0.0080    | 68638.42          | 0.0116    |
| 68582.23          | 0.0686    | 68610.72          | 0.0088    | 68639.15          | 0.0109    |
| 68582.96          | 0.0638    | 68611.45          | 0.0115    | 68639.88          | 0.0090    |
| 68583.69          | 0.0609    | 68612.18          | 0.0119    | 68640.61          | 0.0084    |
| 68584.42          | 0.0516    | 68612.91          | 0.0138    | 68640.98          | 0.0070    |
| 68585.16          | 0.0405    | 68613.64          | 0.0152    | 68641.71          | 0.0055    |
| 68585.89          | 0.0330    | 68614.37          | 0.0175    | 68642.44          | 0.0057    |
| 68586.62          | 0.0288    | 68615.1           | 0.0186    | 68643.16          | 0.0051    |
| 68587.35          | 0.0243    | 68615.83          | 0.0190    | 68643.89          | 0.0051    |
| 68588.08          | 0.0214    | 68616.56          | 0.0191    | 68644.62          | 0.0049    |
| 68588.81          | 0.0192    | 68617.29          | 0.0198    | 68645.35          | 0.0041    |
| 68589.54          | 0.0173    | 68618.02          | 0.0208    | 68646.07          | 0.0040    |
| 68590.27          | 0.0179    | 68618.75          | 0.0190    | 68646.8           | 0.0037    |
| 68591.01          | 0.0180    | 68619.48          | 0.0188    | 68647.53          | 0.0043    |
| 68591.74          | 0.0183    | 68620.21          | 0.0181    | 68648.26          | 0.0040    |
| 68592.47          | 0.0192    | 68620.94          | 0.0159    | 68648.98          | 0.0038    |
| 68593.2           | 0.0194    | 68621.67          | 0.0148    | 68649.71          | 0.0038    |
| 68593.93          | 0.0217    | 68622.39          | 0.0151    | 68650.44          | 0.0039    |
| 68594.66          | 0.0224    | 68623.12          | 0.0152    | 68651.16          | 0.0044    |
| 68595.39          | 0.0228    | 68623.85          | 0.0152    | 68651.89          | 0.0044    |
| 68596.12          | 0.0226    | 68624.58          | 0.0163    | 68652.62          | 0.0049    |
| 68596.85          | 0.0237    | 68625.31          | 0.0170    | 68653.35          | 0.0063    |

Table S1. Continued

| VUV photon energy | Intensity | VUV photon energy | Intensity | VUV photon energy | Intensity |
|-------------------|-----------|-------------------|-----------|-------------------|-----------|
| 68654.07          | 0.0062    | 68682.39          | 0.0150    | 68710.64          | 0.0108    |
| 68654.8           | 0.0063    | 68683.11          | 0.0172    | 68711.36          | 0.0099    |
| 68655.53          | 0.0070    | 68683.84          | 0.0176    | 68712.08          | 0.0103    |
| 68656.25          | 0.0073    | 68684.56          | 0.0181    | 68712.81          | 0.0093    |
| 68656.98          | 0.0080    | 68685.29          | 0.0180    | 68713.53          | 0.0087    |
| 68657.71          | 0.0085    | 68686.01          | 0.0179    | 68714.25          | 0.0108    |
| 68658.43          | 0.0092    | 68686.74          | 0.0182    | 68714.98          | 0.0115    |
| 68659.16          | 0.0083    | 68687.46          | 0.0181    | 68715.7           | 0.0127    |
| 68659.89          | 0.0080    | 68688.19          | 0.0177    | 68716.42          | 0.0137    |
| 68660.61          | 0.0092    | 68688.91          | 0.0172    | 68717.14          | 0.0160    |
| 68661.34          | 0.0093    | 68689.64          | 0.0173    | 68717.87          | 0.0178    |
| 68662.07          | 0.0100    | 68690.36          | 0.0184    | 68718.59          | 0.0207    |
| 68662.79          | 0.0098    | 68691.09          | 0.0186    | 68719.31          | 0.0233    |
| 68663.52          | 0.0113    | 68691.81          | 0.0214    | 68720.04          | 0.0251    |
| 68664.24          | 0.0123    | 68692.54          | 0.0250    | 68720.76          | 0.0267    |
| 68664.97          | 0.0127    | 68693.26          | 0.0299    | 68721.48          | 0.0296    |
| 68665.7           | 0.0128    | 68693.98          | 0.0357    | 68722.2           | 0.0312    |
| 68666.42          | 0.0125    | 68694.71          | 0.0447    | 68722.93          | 0.0312    |
| 68667.15          | 0.0136    | 68695.43          | 0.0542    | 68723.65          | 0.0326    |
| 68667.88          | 0.0139    | 68696.16          | 0.0702    | 68724.37          | 0.0319    |
| 68668.6           | 0.0143    | 68696.88          | 0.0834    | 68725.1           | 0.0320    |
| 68669.33          | 0.0139    | 68697.61          | 0.0972    | 68725.82          | 0.0307    |
| 68670.05          | 0.0128    | 68698.33          | 0.1061    | 68726.54          | 0.0289    |
| 68670.78          | 0.0121    | 68699.05          | 0.1149    | 68727.26          | 0.0269    |
| 68671.51          | 0.0118    | 68699.78          | 0.1209    | 68727.99          | 0.0259    |
| 68672.23          | 0.0114    | 68700.5           | 0.1176    | 68728.71          | 0.0248    |
| 68672.96          | 0.0113    | 68701.23          | 0.1119    | 68729.43          | 0.0233    |
| 68673.68          | 0.0103    | 68701.95          | 0.1010    | 68730.15          | 0.0235    |
| 68674.41          | 0.0105    | 68702.68          | 0.0878    | 68730.87          | 0.0227    |
| 68675.13          | 0.0101    | 68703.4           | 0.0716    | 68731.6           | 0.0213    |
| 68675.86          | 0.0104    | 68704.12          | 0.0577    | 68732.32          | 0.0207    |
| 68676.58          | 0.0102    | 68704.85          | 0.0441    | 68733.04          | 0.0207    |
| 68677.31          | 0.0105    | 68705.57          | 0.0348    | 68733.76          | 0.0191    |
| 68678.04          | 0.0117    | 68706.29          | 0.0278    | 68734.48          | 0.0184    |
| 68678.76          | 0.0117    | 68707.02          | 0.0223    | 68735.21          | 0.0184    |
| 68679.49          | 0.0128    | 68707.74          | 0.0182    | 68735.93          | 0.0177    |
| 68680.21          | 0.0135    | 68708.47          | 0.0149    | 68736.65          | 0.0174    |
| 68680.94          | 0.0150    | 68709.19          | 0.0126    | 68737.37          | 0.0175    |
| 68681.66          | 0.0156    | 68709.91          | 0.0114    | 68738.09          | 0.0188    |

Table S1. Continued

| VUV photon energy | Intensity | VUV photon energy | Intensity | VUV photon energy | Intensity |
|-------------------|-----------|-------------------|-----------|-------------------|-----------|
| 68738.82          | 0.0198    | 68766.93          | 0.1369    | 68794.98          | 0.0090    |
| 68739.54          | 0.0216    | 68767.65          | 0.1266    | 68795.69          | 0.0087    |
| 68740.26          | 0.0245    | 68768.37          | 0.1094    | 68796.41          | 0.0079    |
| 68740.98          | 0.0277    | 68769.09          | 0.0988    | 68797.13          | 0.0071    |
| 68741.7           | 0.0309    | 68769.81          | 0.0902    | 68797.85          | 0.0069    |
| 68742.42          | 0.0350    | 68770.53          | 0.0792    | 68798.57          | 0.0057    |
| 68743.15          | 0.0390    | 68771.25          | 0.0676    | 68799.28          | 0.0040    |
| 68743.87          | 0.0437    | 68771.97          | 0.0559    | 68800             | 0.0054    |
| 68744.59          | 0.0471    | 68772.69          | 0.0445    | 68800.72          | 0.0040    |
| 68745.31          | 0.0473    | 68773.41          | 0.0372    | 68801.44          | 0.0046    |
| 68746.03          | 0.0488    | 68774.13          | 0.0308    | 68802.16          | 0.0045    |
| 68746.75          | 0.0511    | 68774.85          | 0.0269    | 68802.87          | 0.0042    |
| 68747.47          | 0.0501    | 68775.57          | 0.0224    | 68803.59          | 0.0037    |
| 68748.19          | 0.0544    | 68776.29          | 0.0174    | 68804.31          | 0.0043    |
| 68748.92          | 0.0547    | 68777             | 0.0159    | 68805.03          | 0.0042    |
| 68749.64          | 0.0586    | 68777.72          | 0.0130    | 68805.74          | 0.0047    |
| 68750.36          | 0.0649    | 68778.44          | 0.0111    | 68806.46          | 0.0039    |
| 68751.08          | 0.0750    | 68779.16          | 0.0104    | 68807.18          | 0.0049    |
| 68751.8           | 0.0884    | 68779.88          | 0.0097    | 68807.9           | 0.0043    |
| 68752.52          | 0.1103    | 68780.6           | 0.0079    | 68808.61          | 0.0042    |
| 68753.24          | 0.1274    | 68781.32          | 0.0072    | 68809.33          | 0.0047    |
| 68753.96          | 0.1584    | 68782.04          | 0.0077    | 68810.05          | 0.0043    |
| 68754.68          | 0.1947    | 68782.76          | 0.0060    | 68810.77          | 0.0033    |
| 68755.4           | 0.2368    | 68783.48          | 0.0065    | 68811.48          | 0.0047    |
| 68756.12          | 0.2861    | 68784.2           | 0.0070    | 68812.2           | 0.0044    |
| 68756.84          | 0.3344    | 68784.92          | 0.0067    | 68812.92          | 0.0043    |
| 68757.57          | 0.3698    | 68785.63          | 0.0086    | 68813.64          | 0.0047    |
| 68758.29          | 0.3889    | 68786.35          | 0.0086    | 68814.35          | 0.0057    |
| 68759.01          | 0.4054    | 68787.07          | 0.0091    | 68815.07          | 0.0041    |
| 68759.73          | 0.4071    | 68787.79          | 0.0114    | 68815.79          | 0.0053    |
| 68760.45          | 0.4104    | 68788.51          | 0.0112    | 68816.5           | 0.0047    |
| 68761.17          | 0.3894    | 68789.23          | 0.0100    | 68817.22          | 0.0052    |
| 68761.89          | 0.3511    | 68789.95          | 0.0110    | 68817.94          | 0.0057    |
| 68762.61          | 0.3214    | 68790.66          | 0.0112    | 68818.65          | 0.0052    |
| 68763.33          | 0.2789    | 68791.38          | 0.0111    | 68819.37          | 0.0057    |
| 68764.05          | 0.2423    | 68792.1           | 0.0104    | 68820.09          | 0.0060    |
| 68764.77          | 0.2063    | 68792.82          | 0.0104    | 68820.8           | 0.0069    |
| 68765.49          | 0.1849    | 68793.54          | 0.0099    | 68821.52          | 0.0055    |
| 68766.21          | 0.1635    | 68794.26          | 0.0104    | 68822.24          | 0.0054    |

Table S1. Continued

| VUV photon energy | Intensity | VUV photon energy | Intensity | VUV photon energy | Intensity |
|-------------------|-----------|-------------------|-----------|-------------------|-----------|
| 68822.95          | 0.0046    | 68850.87          | 0.0059    | 68886.16          | 0.0149    |
| 68823.67          | 0.0047    | 68851.58          | 0.0064    | 68887.26          | 0.0121    |
| 68824.39          | 0.0034    | 68852.3           | 0.0066    | 68888.36          | 0.0109    |
| 68825.1           | 0.0043    | 68853.01          | 0.0064    | 68889.45          | 0.0094    |
| 68825.82          | 0.0046    | 68853.73          | 0.0075    | 68890.55          | 0.0077    |
| 68826.54          | 0.0044    | 68854.44          | 0.0077    | 68891.65          | 0.0060    |
| 68827.25          | 0.0062    | 68855.16          | 0.0100    | 68892.75          | 0.0061    |
| 68827.97          | 0.0063    | 68855.87          | 0.0116    | 68893.84          | 0.0062    |
| 68828.69          | 0.0060    | 68856.59          | 0.0123    | 68894.94          | 0.0058    |
| 68829.4           | 0.0068    | 68857.3           | 0.0152    | 68896.03          | 0.0073    |
| 68830.12          | 0.0067    | 68858.01          | 0.0172    | 68897.13          | 0.0059    |
| 68830.83          | 0.0090    | 68858.73          | 0.0199    | 68898.23          | 0.0069    |
| 68831.55          | 0.0077    | 68859.44          | 0.0234    | 68899.32          | 0.0064    |
| 68832.27          | 0.0087    | 68860.16          | 0.0258    | 68900.42          | 0.0045    |
| 68832.98          | 0.0089    | 68860.87          | 0.0273    | 68901.51          | 0.0061    |
| 68833.7           | 0.0086    | 68861.59          | 0.0275    | 68902.61          | 0.0077    |
| 68834.41          | 0.0084    | 68862.3           | 0.0281    | 68903.71          | 0.0086    |
| 68835.13          | 0.0086    | 68863.01          | 0.0279    | 68904.8           | 0.0096    |
| 68835.85          | 0.0082    | 68863.73          | 0.0255    | 68905.9           | 0.0115    |
| 68836.56          | 0.0083    | 68864.44          | 0.0245    | 68906.99          | 0.0113    |
| 68837.28          | 0.0084    | 68865.3           | 0.0234    | 68908.09          | 0.0125    |
| 68837.99          | 0.0089    | 68866.4           | 0.0188    | 68909.18          | 0.0096    |
| 68838.71          | 0.0088    | 68867.5           | 0.0138    | 68910.28          | 0.0125    |
| 68839.42          | 0.0092    | 68868.59          | 0.0115    | 68911.37          | 0.0123    |
| 68840.14          | 0.0098    | 68869.69          | 0.0083    | 68912.47          | 0.0156    |
| 68840.86          | 0.0085    | 68870.79          | 0.0072    | 68913.56          | 0.0173    |
| 68841.57          | 0.0088    | 68871.89          | 0.0060    | 68914.66          | 0.0200    |
| 68842.29          | 0.0101    | 68872.99          | 0.0066    | 68915.75          | 0.0251    |
| 68843             | 0.0094    | 68874.09          | 0.0043    | 68916.85          | 0.0330    |
| 68843.72          | 0.0099    | 68875.19          | 0.0060    | 68917.94          | 0.0417    |
| 68844.43          | 0.0074    | 68876.28          | 0.0059    | 68919.03          | 0.0620    |
| 68845.15          | 0.0083    | 68877.38          | 0.0063    | 68920.13          | 0.0841    |
| 68845.86          | 0.0082    | 68878.48          | 0.0087    | 68921.22          | 0.0998    |
| 68846.58          | 0.0077    | 68879.58          | 0.0095    | 68922.32          | 0.1111    |
| 68847.29          | 0.0064    | 68880.68          | 0.0099    | 68923.41          | 0.1167    |
| 68848.01          | 0.0067    | 68881.77          | 0.0127    | 68924.5           | 0.1128    |
| 68848.72          | 0.0066    | 68882.87          | 0.0116    | 68925.6           | 0.0909    |
| 68849.44          | 0.0067    | 68883.97          | 0.0142    | 68926.69          | 0.0881    |
| 68850.15          | 0.0056    | 68885.07          | 0.0145    | 68927.79          | 0.0718    |

Table S1. Continued

| VUV photon energy | Intensity | VUV photon energy | Intensity | VUV photon energy | Intensity |
|-------------------|-----------|-------------------|-----------|-------------------|-----------|
| 68928.88          | 0.0660    | 68971.44          | 0.0105    | 69013.84          | 0.0354    |
| 68929.97          | 0.0594    | 68972.53          | 0.0108    | 69014.93          | 0.0328    |
| 68931.06          | 0.0559    | 68973.62          | 0.0094    | 69016.01          | 0.0345    |
| 68932.16          | 0.0528    | 68974.71          | 0.0099    | 69017.1           | 0.0291    |
| 68933.25          | 0.0437    | 68975.79          | 0.0085    | 69018.18          | 0.0174    |
| 68934.34          | 0.0374    | 68976.88          | 0.0073    | 69019.27          | 0.0173    |
| 68935.44          | 0.0361    | 68977.97          | 0.0039    | 69020.35          | 0.0142    |
| 68936.53          | 0.0313    | 68979.06          | 0.0066    | 69021.44          | 0.0141    |
| 68937.62          | 0.0340    | 68980.15          | 0.0066    | 69022.52          | 0.0129    |
| 68938.71          | 0.0386    | 68981.24          | 0.0075    | 69023.61          | 0.0126    |
| 68939.81          | 0.0447    | 68982.33          | 0.0065    | 69024.69          | 0.0074    |
| 68940.9           | 0.0408    | 68983.41          | 0.0066    | 69025.78          | 0.0060    |
| 68941.99          | 0.0505    | 68984.5           | 0.0104    | 69026.86          | 0.0097    |
| 68943.08          | 0.0511    | 68985.59          | 0.0139    | 69027.94          | 0.0046    |
| 68944.17          | 0.0459    | 68986.68          | 0.0160    | 69029.03          | 0.0101    |
| 68945.27          | 0.0359    | 68987.77          | 0.0159    | 69030.11          | 0.0099    |
| 68946.36          | 0.0283    | 68988.85          | 0.0191    | 69031.19          | 0.0110    |
| 68947.45          | 0.0215    | 68989.94          | 0.0168    | 69032.28          | 0.0129    |
| 68948.54          | 0.0194    | 68991.03          | 0.0132    | 69033.36          | 0.0141    |
| 68949.63          | 0.0129    | 68992.12          | 0.0137    | 69034.45          | 0.0130    |
| 68950.72          | 0.0155    | 68993.2           | 0.0134    | 69035.53          | 0.0140    |
| 68951.81          | 0.0145    | 68994.29          | 0.0116    | 69036.61          | 0.0157    |
| 68952.91          | 0.0128    | 68995.38          | 0.0057    | 69037.7           | 0.0189    |
| 68954             | 0.0117    | 68996.46          | 0.0100    | 69038.78          | 0.0229    |
| 68955.09          | 0.0096    | 68997.55          | 0.0103    | 69039.86          | 0.0215    |
| 68956.18          | 0.0093    | 68998.64          | 0.0090    | 69040.94          | 0.0208    |
| 68957.27          | 0.0091    | 68999.72          | 0.0096    | 69042.03          | 0.0184    |
| 68958.36          | 0.0076    | 69000.81          | 0.0094    | 69043.11          | 0.0159    |
| 68959.45          | 0.0075    | 69001.9           | 0.0085    | 69044.19          | 0.0091    |
| 68960.54          | 0.0071    | 69002.98          | 0.0100    | 69045.27          | 0.0040    |
| 68961.63          | 0.0066    | 69004.07          | 0.0099    | 69046.36          | 0.0117    |
| 68962.72          | 0.0073    | 69005.16          | 0.0142    | 69047.44          | 0.0118    |
| 68963.81          | 0.0057    | 69006.24          | 0.0152    | 69048.52          | 0.0113    |
| 68964.9           | 0.0077    | 69007.33          | 0.0162    | 69049.6           | 0.0102    |
| 68965.99          | 0.0087    | 69008.41          | 0.0266    | 69050.69          | 0.0092    |
| 68967.08          | 0.0108    | 69009.5           | 0.0328    | 69051.77          | 0.0092    |
| 68968.17          | 0.0114    | 69010.59          | 0.0366    | 69052.85          | 0.0039    |
| 68969.26          | 0.0096    | 69011.67          | 0.0447    | 69053.93          | 0.0037    |
| 68970.35          | 0.0084    | 69012.76          | 0.0452    | 69055.01          | 0.0135    |



Table S1. Continued

| VUV photon energy | Intensity | VUV photon energy | Intensity | VUV photon energy | Intensity |
|-------------------|-----------|-------------------|-----------|-------------------|-----------|
| 69056.09          | 0.0153    | 69098.19          | 0.0150    | 69140.14          | 0.0080    |
| 69057.17          | 0.0159    | 69099.27          | 0.0134    | 69141.21          | 0.0072    |
| 69058.26          | 0.0167    | 69100.35          | 0.0153    | 69142.28          | 0.0085    |
| 69059.34          | 0.0163    | 69101.42          | 0.0188    | 69143.36          | 0.0071    |
| 69060.42          | 0.0086    | 69102.5           | 0.0236    | 69144.43          | 0.0072    |
| 69061.5           | 0.0076    | 69103.58          | 0.0293    | 69145.5           | 0.0080    |
| 69062.58          | 0.0122    | 69104.65          | 0.0351    | 69146.58          | 0.0080    |
| 69063.66          | 0.0101    | 69105.73          | 0.0372    | 69147.65          | 0.0096    |
| 69064.74          | 0.0101    | 69106.81          | 0.0395    | 69148.72          | 0.0110    |
| 69065.82          | 0.0090    | 69107.88          | 0.0359    | 69149.8           | 0.0129    |
| 69066.9           | 0.0035    | 69108.96          | 0.0328    | 69150.87          | 0.0131    |
| 69067.98          | 0.0030    | 69110.04          | 0.0245    | 69151.94          | 0.0150    |
| 69069.06          | 0.0066    | 69111.11          | 0.0179    | 69153.01          | 0.0146    |
| 69070.14          | 0.0085    | 69112.19          | 0.0136    | 69154.09          | 0.0155    |
| 69071.22          | 0.0084    | 69113.27          | 0.0093    | 69155.16          | 0.0156    |
| 69072.3           | 0.0030    | 69114.34          | 0.0083    | 69156.23          | 0.0155    |
| 69073.38          | 0.0088    | 69115.42          | 0.0079    | 69157.3           | 0.0156    |
| 69074.46          | 0.0033    | 69116.49          | 0.0073    | 69158.37          | 0.0199    |
| 69075.54          | 0.0082    | 69117.57          | 0.0073    | 69159.45          | 0.0251    |
| 69076.62          | 0.0054    | 69118.65          | 0.0075    | 69160.52          | 0.0329    |
| 69077.7           | 0.0091    | 69119.72          | 0.0059    | 69161.59          | 0.0459    |
| 69078.78          | 0.0088    | 69120.8           | 0.0067    | 69162.66          | 0.0542    |
| 69079.86          | 0.0033    | 69121.87          | 0.0065    | 69163.73          | 0.0565    |
| 69080.94          | 0.0042    | 69122.95          | 0.0069    | 69164.8           | 0.0576    |
| 69082.02          | 0.0120    | 69124.02          | 0.0063    | 69165.87          | 0.0565    |
| 69083.1           | 0.0139    | 69125.1           | 0.0087    | 69166.95          | 0.0541    |
| 69084.18          | 0.0050    | 69126.17          | 0.0081    | 69168.02          | 0.0424    |
| 69085.25          | 0.0196    | 69127.25          | 0.0093    | 69169.09          | 0.0387    |
| 69086.33          | 0.0118    | 69128.32          | 0.0103    | 69170.16          | 0.0377    |
| 69087.41          | 0.0174    | 69129.4           | 0.0103    | 69171.23          | 0.0357    |
| 69088.49          | 0.0100    | 69130.47          | 0.0095    | 69172.3           | 0.0344    |
| 69089.57          | 0.0186    | 69131.55          | 0.0099    | 69173.37          | 0.0372    |
| 69090.65          | 0.0164    | 69132.62          | 0.0105    | 69174.44          | 0.0352    |
| 69091.72          | 0.0056    | 69133.69          | 0.0102    | 69175.51          | 0.0308    |
| 69092.8           | 0.0138    | 69134.77          | 0.0087    | 69176.58          | 0.0274    |
| 69093.88          | 0.0044    | 69135.84          | 0.0091    | 69177.65          | 0.0234    |
| 69094.96          | 0.0104    | 69136.92          | 0.0095    | 69178.72          | 0.0197    |
| 69096.04          | 0.0046    | 69137.99          | 0.0082    | 69179.79          | 0.0162    |
| 69097.11          | 0.0142    | 69139.06          | 0.0084    | 69180.86          | 0.0117    |

Table S1. Continued

| VUV photon energy | Intensity | VUV photon energy | Intensity | VUV photon energy | Intensity |
|-------------------|-----------|-------------------|-----------|-------------------|-----------|
| 69181.93          | 0.0095    | 69223.58          | 0.0119    | 69265.07          | 0.0201    |
| 69183             | 0.0084    | 69224.64          | 0.0146    | 69266.13          | 0.0218    |
| 69184.07          | 0.0074    | 69225.71          | 0.0141    | 69267.19          | 0.0192    |
| 69185.14          | 0.0079    | 69226.77          | 0.0148    | 69268.26          | 0.0197    |
| 69186.21          | 0.0073    | 69227.84          | 0.0172    | 69269.32          | 0.0206    |
| 69187.28          | 0.0073    | 69228.9           | 0.0186    | 69270.38          | 0.0173    |
| 69188.35          | 0.0064    | 69229.97          | 0.0240    | 69271.44          | 0.0170    |
| 69189.42          | 0.0069    | 69231.03          | 0.0283    | 69272.5           | 0.0143    |
| 69190.49          | 0.0081    | 69232.1           | 0.0365    | 69273.56          | 0.0113    |
| 69191.56          | 0.0078    | 69233.16          | 0.0450    | 69274.62          | 0.0094    |
| 69192.62          | 0.0084    | 69234.23          | 0.0511    | 69275.69          | 0.0086    |
| 69193.69          | 0.0093    | 69235.29          | 0.0525    | 69276.75          | 0.0069    |
| 69194.76          | 0.0090    | 69236.36          | 0.0600    | 69277.81          | 0.0082    |
| 69195.83          | 0.0103    | 69237.42          | 0.0547    | 69278.87          | 0.0071    |
| 69196.9           | 0.0117    | 69238.49          | 0.0526    | 69279.93          | 0.0065    |
| 69197.97          | 0.0133    | 69239.55          | 0.0458    | 69280.99          | 0.0073    |
| 69199.03          | 0.0138    | 69240.62          | 0.0379    | 69282.05          | 0.0080    |
| 69200.1           | 0.0148    | 69241.68          | 0.0358    | 69283.11          | 0.0079    |
| 69201.17          | 0.0147    | 69242.75          | 0.0292    | 69284.17          | 0.0078    |
| 69202.24          | 0.0142    | 69243.81          | 0.0273    | 69285.23          | 0.0083    |
| 69203.31          | 0.0127    | 69244.87          | 0.0253    | 69286.29          | 0.0086    |
| 69204.37          | 0.0134    | 69245.94          | 0.0223    | 69287.35          | 0.0097    |
| 69205.44          | 0.0110    | 69247             | 0.0181    | 69288.41          | 0.0097    |
| 69206.51          | 0.0107    | 69248.06          | 0.0163    | 69289.47          | 0.0106    |
| 69207.58          | 0.0110    | 69249.13          | 0.0145    | 69290.53          | 0.0103    |
| 69208.64          | 0.0097    | 69250.19          | 0.0147    | 69291.59          | 0.0106    |
| 69209.71          | 0.0088    | 69251.26          | 0.0137    | 69292.65          | 0.0113    |
| 69210.78          | 0.0101    | 69252.32          | 0.0134    | 69293.71          | 0.0108    |
| 69211.85          | 0.0099    | 69253.38          | 0.0153    | 69294.77          | 0.0098    |
| 69212.91          | 0.0097    | 69254.44          | 0.0174    | 69295.83          | 0.0104    |
| 69213.98          | 0.0095    | 69255.51          | 0.0207    | 69296.89          | 0.0106    |
| 69215.05          | 0.0103    | 69256.57          | 0.0235    | 69297.95          | 0.0100    |
| 69216.11          | 0.0115    | 69257.63          | 0.0284    | 69299.01          | 0.0117    |
| 69217.18          | 0.0111    | 69258.7           | 0.0321    | 69300.06          | 0.0136    |
| 69218.25          | 0.0118    | 69259.76          | 0.0329    | 69301.12          | 0.0152    |
| 69219.31          | 0.0124    | 69260.82          | 0.0330    | 69302.18          | 0.0173    |
| 69220.38          | 0.0126    | 69261.88          | 0.0306    | 69303.24          | 0.0198    |
| 69221.44          | 0.0119    | 69262.95          | 0.0272    | 69304.3           | 0.0208    |
| 69222.51          | 0.0110    | 69264.01          | 0.0251    | 69305.36          | 0.0205    |

Table S1. Continued

| VUV photon energy | Intensity | VUV photon energy | Intensity | VUV photon energy | Intensity |
|-------------------|-----------|-------------------|-----------|-------------------|-----------|
| 69306.42          | 0.0197    | 69347.61          | 0.0093    | 69388.66          | 0.0120    |
| 69307.47          | 0.0188    | 69348.67          | 0.0092    | 69389.71          | 0.0143    |
| 69308.53          | 0.0150    | 69349.72          | 0.0106    | 69390.76          | 0.0173    |
| 69309.59          | 0.0139    | 69350.78          | 0.0092    | 69391.81          | 0.0214    |
| 69310.65          | 0.0124    | 69351.83          | 0.0090    | 69392.86          | 0.0233    |
| 69311.71          | 0.0106    | 69352.88          | 0.0101    | 69393.91          | 0.0299    |
| 69312.76          | 0.0113    | 69353.94          | 0.0096    | 69394.96          | 0.0332    |
| 69313.82          | 0.0107    | 69354.99          | 0.0099    | 69396.01          | 0.0348    |
| 69314.88          | 0.0114    | 69356.04          | 0.0093    | 69397.06          | 0.0349    |
| 69315.94          | 0.0116    | 69357.1           | 0.0089    | 69398.11          | 0.0330    |
| 69316.99          | 0.0128    | 69358.15          | 0.0087    | 69399.16          | 0.0311    |
| 69318.05          | 0.0131    | 69359.21          | 0.0101    | 69400.21          | 0.0273    |
| 69319.11          | 0.0147    | 69360.26          | 0.0102    | 69401.26          | 0.0257    |
| 69320.16          | 0.0159    | 69361.31          | 0.0100    | 69402.31          | 0.0251    |
| 69321.22          | 0.0168    | 69362.37          | 0.0098    | 69403.36          | 0.0213    |
| 69322.28          | 0.0205    | 69363.42          | 0.0103    | 69404.41          | 0.0195    |
| 69323.33          | 0.0273    | 69364.47          | 0.0098    | 69405.46          | 0.0175    |
| 69324.39          | 0.0360    | 69365.52          | 0.0113    | 69406.51          | 0.0147    |
| 69325.45          | 0.0431    | 69366.58          | 0.0121    | 69407.56          | 0.0148    |
| 69326.5           | 0.0449    | 69367.63          | 0.0127    | 69408.61          | 0.0119    |
| 69327.56          | 0.0490    | 69368.68          | 0.0119    | 69409.66          | 0.0122    |
| 69328.62          | 0.0521    | 69369.73          | 0.0119    | 69410.71          | 0.0113    |
| 69329.67          | 0.0484    | 69370.79          | 0.0111    | 69411.75          | 0.0128    |
| 69330.73          | 0.0424    | 69371.84          | 0.0105    | 69412.8           | 0.0125    |
| 69331.78          | 0.0379    | 69372.89          | 0.0124    | 69413.85          | 0.0128    |
| 69332.84          | 0.0358    | 69373.94          | 0.0109    | 69414.9           | 0.0149    |
| 69333.9           | 0.0323    | 69375             | 0.0100    | 69415.95          | 0.0173    |
| 69334.95          | 0.0281    | 69376.05          | 0.0084    | 69417             | 0.0196    |
| 69336.01          | 0.0277    | 69377.1           | 0.0091    | 69418.04          | 0.0237    |
| 69337.06          | 0.0260    | 69378.15          | 0.0098    | 69419.09          | 0.0263    |
| 69338.12          | 0.0226    | 69379.2           | 0.0102    | 69420.14          | 0.0296    |
| 69339.17          | 0.0207    | 69380.25          | 0.0116    | 69421.19          | 0.0311    |
| 69340.23          | 0.0165    | 69381.31          | 0.0108    | 69422.23          | 0.0306    |
| 69341.28          | 0.0133    | 69382.36          | 0.0093    | 69423.28          | 0.0294    |
| 69342.34          | 0.0120    | 69383.41          | 0.0100    | 69424.33          | 0.0294    |
| 69343.39          | 0.0103    | 69384.46          | 0.0096    | 69425.38          | 0.0267    |
| 69344.45          | 0.0087    | 69385.51          | 0.0096    | 69426.42          | 0.0224    |
| 69345.5           | 0.0086    | 69386.56          | 0.0107    | 69427.47          | 0.0210    |
| 69346.56          | 0.0094    | 69387.61          | 0.0114    | 69428.52          | 0.0198    |

Table S1. Continued

| VUV photon energy | Intensity | VUV photon energy | Intensity | VUV photon energy | Intensity |
|-------------------|-----------|-------------------|-----------|-------------------|-----------|
| 69429.57          | 0.0179    | 69470.32          | 0.0148    | 69509.84          | 0.0137    |
| 69430.61          | 0.0164    | 69471.37          | 0.0129    | 69510.88          | 0.0154    |
| 69431.66          | 0.0156    | 69472.41          | 0.0131    | 69511.92          | 0.0154    |
| 69432.71          | 0.0137    | 69473.45          | 0.0107    | 69512.96          | 0.0172    |
| 69433.75          | 0.0137    | 69474.5           | 0.0109    | 69514             | 0.0184    |
| 69434.8           | 0.0124    | 69475.54          | 0.0128    | 69515.04          | 0.0181    |
| 69435.85          | 0.0120    | 69476.58          | 0.0144    | 69516.08          | 0.0177    |
| 69436.89          | 0.0109    | 69477.62          | 0.0171    | 69517.12          | 0.0170    |
| 69437.94          | 0.0112    | 69478.67          | 0.0216    | 69518.16          | 0.0163    |
| 69438.98          | 0.0100    | 69479.71          | 0.0266    | 69519.2           | 0.0169    |
| 69440.03          | 0.0097    | 69480.75          | 0.0312    | 69520.24          | 0.0171    |
| 69441.08          | 0.0103    | 69481.79          | 0.0335    | 69521.28          | 0.0176    |
| 69442.12          | 0.0100    | 69482.83          | 0.0377    | 69522.31          | 0.0202    |
| 69443.17          | 0.0102    | 69483.88          | 0.0397    | 69523.35          | 0.0228    |
| 69444.21          | 0.0099    | 69484.92          | 0.0396    | 69524.39          | 0.0262    |
| 69445.26          | 0.0092    | 69485.96          | 0.0420    | 69525.43          | 0.0305    |
| 69446.3           | 0.0096    | 69487             | 0.0399    | 69526.47          | 0.0306    |
| 69447.35          | 0.0094    | 69488.04          | 0.0401    | 69527.51          | 0.0327    |
| 69448.39          | 0.0074    | 69489.09          | 0.0419    | 69528.54          | 0.0334    |
| 69449.44          | 0.0077    | 69490.13          | 0.0406    | 69529.58          | 0.0314    |
| 69450.49          | 0.0081    | 69491.17          | 0.0372    | 69530.62          | 0.0310    |
| 69451.53          | 0.0075    | 69492.21          | 0.0335    | 69531.66          | 0.0297    |
| 69452.57          | 0.0079    | 69493.25          | 0.0308    | 69532.7           | 0.0307    |
| 69453.62          | 0.0078    | 69494.29          | 0.0249    | 69533.73          | 0.0284    |
| 69454.66          | 0.0069    | 69495.33          | 0.0209    | 69534.77          | 0.0292    |
| 69455.71          | 0.0072    | 69496.37          | 0.0183    | 69535.81          | 0.0270    |
| 69456.75          | 0.0072    | 69497.41          | 0.0170    | 69536.85          | 0.0257    |
| 69457.8           | 0.0073    | 69498.46          | 0.0149    | 69537.88          | 0.0234    |
| 69458.84          | 0.0067    | 69499.5           | 0.0139    | 69538.92          | 0.0203    |
| 69459.89          | 0.0063    | 69500.54          | 0.0120    | 69539.96          | 0.0182    |
| 69460.93          | 0.0077    | 69501.58          | 0.0115    | 69541             | 0.0151    |
| 69461.97          | 0.0087    | 69502.62          | 0.0115    | 69542.03          | 0.0133    |
| 69463.02          | 0.0099    | 69503.66          | 0.0102    | 69543.07          | 0.0111    |
| 69464.06          | 0.0118    | 69504.29          | 0.0095    | 69544.11          | 0.0110    |
| 69465.11          | 0.0140    | 69504.64          | 0.0102    | 69545.14          | 0.0118    |
| 69466.15          | 0.0152    | 69505.68          | 0.0097    | 69546.18          | 0.0109    |
| 69467.19          | 0.0156    | 69506.72          | 0.0094    | 69547.22          | 0.0096    |
| 69468.24          | 0.0168    | 69507.76          | 0.0100    | 69548.25          | 0.0107    |
| 69469.28          | 0.0155    | 69508.8           | 0.0111    | 69549.29          | 0.0096    |

Table S1. Continued

| VUV photon energy | Intensity | VUV photon energy | Intensity | VUV photon energy | Intensity |
|-------------------|-----------|-------------------|-----------|-------------------|-----------|
| 69550.32          | 0.0109    | 69590.66          | 0.0230    | 69630.86          | 0.0138    |
| 69551.36          | 0.0107    | 69591.69          | 0.0243    | 69631.89          | 0.0153    |
| 69552.4           | 0.0116    | 69592.73          | 0.0238    | 69632.92          | 0.0139    |
| 69553.43          | 0.0130    | 69593.76          | 0.0226    | 69633.94          | 0.0137    |
| 69554.47          | 0.0147    | 69594.79          | 0.0212    | 69634.97          | 0.0155    |
| 69555.5           | 0.0169    | 69595.82          | 0.0205    | 69636             | 0.0154    |
| 69556.54          | 0.0156    | 69596.86          | 0.0195    | 69637.03          | 0.0165    |
| 69557.58          | 0.0175    | 69597.89          | 0.0168    | 69638.06          | 0.0194    |
| 69558.61          | 0.0179    | 69598.92          | 0.0168    | 69639.09          | 0.0215    |
| 69559.65          | 0.0168    | 69599.95          | 0.0156    | 69640.11          | 0.0230    |
| 69560.68          | 0.0169    | 69600.98          | 0.0146    | 69641.14          | 0.0257    |
| 69561.72          | 0.0161    | 69602.01          | 0.0139    | 69642.17          | 0.0277    |
| 69562.75          | 0.0152    | 69603.05          | 0.0154    | 69643.2           | 0.0281    |
| 69563.79          | 0.0157    | 69604.08          | 0.0138    | 69644.22          | 0.0311    |
| 69564.82          | 0.0154    | 69605.11          | 0.0157    | 69645.25          | 0.0323    |
| 69565.86          | 0.0159    | 69606.14          | 0.0156    | 69646.28          | 0.0328    |
| 69566.89          | 0.0145    | 69607.17          | 0.0143    | 69647.31          | 0.0318    |
| 69567.93          | 0.0153    | 69608.2           | 0.0154    | 69648.33          | 0.0302    |
| 69568.96          | 0.0162    | 69609.23          | 0.0125    | 69649.36          | 0.0302    |
| 69569.99          | 0.0161    | 69610.26          | 0.0125    | 69650.39          | 0.0291    |
| 69571.03          | 0.0162    | 69611.29          | 0.0106    | 69651.42          | 0.0270    |
| 69572.06          | 0.0171    | 69612.32          | 0.0107    | 69652.44          | 0.0256    |
| 69573.1           | 0.0176    | 69613.35          | 0.0105    | 69653.47          | 0.0249    |
| 69574.13          | 0.0188    | 69614.38          | 0.0104    | 69654.5           | 0.0225    |
| 69575.16          | 0.0185    | 69615.41          | 0.0101    | 69655.52          | 0.0205    |
| 69576.2           | 0.0195    | 69616.45          | 0.0099    | 69656.55          | 0.0186    |
| 69577.23          | 0.0202    | 69617.48          | 0.0101    | 69657.58          | 0.0165    |
| 69578.27          | 0.0220    | 69618.51          | 0.0095    | 69658.6           | 0.0151    |
| 69579.3           | 0.0214    | 69619.54          | 0.0108    | 69659.63          | 0.0153    |
| 69580.33          | 0.0255    | 69620.56          | 0.0105    | 69660.65          | 0.0155    |
| 69581.37          | 0.0247    | 69621.59          | 0.0115    | 69661.68          | 0.0150    |
| 69582.4           | 0.0246    | 69622.62          | 0.0132    | 69662.71          | 0.0154    |
| 69583.43          | 0.0241    | 69623.65          | 0.0141    | 69663.73          | 0.0170    |
| 69584.47          | 0.0242    | 69624.68          | 0.0143    | 69664.76          | 0.0159    |
| 69585.5           | 0.0244    | 69625.71          | 0.0150    | 69665.78          | 0.0175    |
| 69586.53          | 0.0247    | 69626.74          | 0.0148    | 69666.81          | 0.0162    |
| 69587.56          | 0.0237    | 69627.77          | 0.0137    | 69667.84          | 0.0156    |
| 69588.6           | 0.0248    | 69628.8           | 0.0137    | 69668.86          | 0.0144    |
| 69589.63          | 0.0233    | 69629.83          | 0.0153    | 69669.89          | 0.0145    |

Table S1. Continued

| VUV photon energy | Intensity | VUV photon energy | Intensity | VUV photon energy | Intensity |
|-------------------|-----------|-------------------|-----------|-------------------|-----------|
| 69670.91          | 0.0133    | 69710.82          | 0.0294    | 69750.59          | 0.0351    |
| 69671.94          | 0.0142    | 69711.84          | 0.0288    | 69751.61          | 0.0339    |
| 69672.96          | 0.0142    | 69712.87          | 0.0299    | 69752.63          | 0.0356    |
| 69673.99          | 0.0157    | 69713.89          | 0.0265    | 69753.65          | 0.0340    |
| 69675.01          | 0.0174    | 69714.91          | 0.0257    | 69754.67          | 0.0341    |
| 69676.04          | 0.0170    | 69715.93          | 0.0230    | 69755.68          | 0.0325    |
| 69677.06          | 0.0163    | 69716.95          | 0.0221    | 69756.7           | 0.0333    |
| 69678.09          | 0.0166    | 69717.97          | 0.0199    | 69757.72          | 0.0315    |
| 69679.11          | 0.0147    | 69718.99          | 0.0207    | 69758.74          | 0.0338    |
| 69680.13          | 0.0137    | 69720.01          | 0.0183    | 69759.75          | 0.0333    |
| 69681.16          | 0.0150    | 69721.03          | 0.0170    | 69760.77          | 0.0322    |
| 69682.18          | 0.0156    | 69722.05          | 0.0172    | 69761.79          | 0.0294    |
| 69683.21          | 0.0170    | 69723.08          | 0.0147    | 69762.8           | 0.0265    |
| 69684.23          | 0.0175    | 69724.1           | 0.0159    | 69763.82          | 0.0238    |
| 69685.25          | 0.0204    | 69725.12          | 0.0163    | 69764.84          | 0.0202    |
| 69686.28          | 0.0218    | 69726.14          | 0.0166    | 69765.85          | 0.0180    |
| 69687.3           | 0.0232    | 69727.16          | 0.0155    | 69766.87          | 0.0171    |
| 69688.33          | 0.0241    | 69728.18          | 0.0173    | 69767.89          | 0.0172    |
| 69689.35          | 0.0242    | 69729.2           | 0.0183    | 69768.9           | 0.0165    |
| 69690.37          | 0.0258    | 69730.22          | 0.0205    | 69769.92          | 0.0160    |
| 69691.4           | 0.0232    | 69731.24          | 0.0231    | 69770.94          | 0.0152    |
| 69692.42          | 0.0236    | 69732.26          | 0.0240    | 69771.95          | 0.0143    |
| 69693.44          | 0.0223    | 69733.28          | 0.0265    | 69772.97          | 0.0154    |
| 69694.47          | 0.0239    | 69734.29          | 0.0290    | 69773.98          | 0.0158    |
| 69695.49          | 0.0214    | 69735.31          | 0.0309    | 69775             | 0.0168    |
| 69696.51          | 0.0207    | 69736.33          | 0.0308    | 69776.02          | 0.0171    |
| 69697.53          | 0.0224    | 69737.35          | 0.0295    | 69777.03          | 0.0174    |
| 69698.56          | 0.0233    | 69738.37          | 0.0294    | 69778.05          | 0.0201    |
| 69699.58          | 0.0243    | 69739.39          | 0.0291    | 69779.06          | 0.0203    |
| 69700.6           | 0.0226    | 69740.41          | 0.0273    | 69780.08          | 0.0189    |
| 69701.63          | 0.0209    | 69741.43          | 0.0273    | 69781.09          | 0.0194    |
| 69702.65          | 0.0199    | 69742.45          | 0.0280    | 69782.11          | 0.0177    |
| 69703.67          | 0.0206    | 69743.47          | 0.0274    | 69783.12          | 0.0172    |
| 69704.69          | 0.0207    | 69744.48          | 0.0266    | 69784.14          | 0.0163    |
| 69705.71          | 0.0205    | 69745.5           | 0.0272    | 69785.15          | 0.0164    |
| 69706.74          | 0.0224    | 69746.52          | 0.0259    | 69786.17          | 0.0158    |
| 69707.76          | 0.0238    | 69747.54          | 0.0287    | 69787.18          | 0.0150    |
| 69708.78          | 0.0251    | 69748.56          | 0.0298    | 69788.2           | 0.0159    |
| 69709.8           | 0.0269    | 69749.58          | 0.0313    | 69789.21          | 0.0154    |

Table S1. Continued

| VUV photon energy | Intensity | VUV photon energy | Intensity | VUV photon energy | Intensity |
|-------------------|-----------|-------------------|-----------|-------------------|-----------|
| 69790.23          | 0.0153    | 69829.72          | 0.0234    | 69869.07          | 0.0289    |
| 69791.24          | 0.0146    | 69830.73          | 0.0210    | 69870.08          | 0.0337    |
| 69792.25          | 0.0158    | 69831.74          | 0.0214    | 69871.09          | 0.0328    |
| 69793.27          | 0.0150    | 69832.75          | 0.0216    | 69872.1           | 0.0334    |
| 69794.28          | 0.0153    | 69833.76          | 0.0224    | 69873.1           | 0.0313    |
| 69795.3           | 0.0166    | 69834.77          | 0.0265    | 69874.11          | 0.0307    |
| 69796.31          | 0.0174    | 69835.78          | 0.0297    | 69875.12          | 0.0291    |
| 69797.32          | 0.0190    | 69836.79          | 0.0318    | 69876.12          | 0.0276    |
| 69798.34          | 0.0206    | 69837.8           | 0.0353    | 69877.13          | 0.0266    |
| 69799.35          | 0.0218    | 69838.81          | 0.0370    | 69878.14          | 0.0260    |
| 69800.37          | 0.0232    | 69839.82          | 0.0384    | 69879.14          | 0.0222    |
| 69801.38          | 0.0266    | 69840.83          | 0.0388    | 69880.15          | 0.0219    |
| 69802.39          | 0.0273    | 69841.84          | 0.0367    | 69881.15          | 0.0247    |
| 69803.41          | 0.0284    | 69842.85          | 0.0344    | 69882.16          | 0.0243    |
| 69804.42          | 0.0287    | 69843.86          | 0.0317    | 69883.17          | 0.0279    |
| 69805.43          | 0.0278    | 69844.87          | 0.0273    | 69884.17          | 0.0296    |
| 69806.45          | 0.0267    | 69845.88          | 0.0243    | 69885.18          | 0.0334    |
| 69807.46          | 0.0274    | 69846.89          | 0.0224    | 69886.18          | 0.0327    |
| 69808.47          | 0.0252    | 69847.9           | 0.0197    | 69887.19          | 0.0349    |
| 69809.48          | 0.0241    | 69848.91          | 0.0195    | 69888.2           | 0.0338    |
| 69810.5           | 0.0224    | 69849.92          | 0.0170    | 69889.2           | 0.0334    |
| 69811.51          | 0.0220    | 69850.93          | 0.0157    | 69890.21          | 0.0311    |
| 69812.52          | 0.0208    | 69851.94          | 0.0152    | 69891.21          | 0.0287    |
| 69813.53          | 0.0197    | 69852.94          | 0.0154    | 69892.22          | 0.0258    |
| 69814.55          | 0.0194    | 69853.95          | 0.0159    | 69893.22          | 0.0269    |
| 69815.56          | 0.0176    | 69854.96          | 0.0147    | 69894.23          | 0.0242    |
| 69816.57          | 0.0174    | 69855.97          | 0.0137    | 69895.23          | 0.0244    |
| 69817.58          | 0.0165    | 69856.98          | 0.0127    | 69896.24          | 0.0233    |
| 69818.59          | 0.0160    | 69857.99          | 0.0130    | 69897.24          | 0.0250    |
| 69819.61          | 0.0158    | 69859             | 0.0116    | 69898.25          | 0.0236    |
| 69820.62          | 0.0156    | 69860             | 0.0123    | 69899.25          | 0.0224    |
| 69821.63          | 0.0174    | 69861.01          | 0.0123    | 69900.26          | 0.0226    |
| 69822.64          | 0.0173    | 69862.02          | 0.0122    | 69901.26          | 0.0216    |
| 69823.65          | 0.0184    | 69863.03          | 0.0149    | 69902.27          | 0.0208    |
| 69824.66          | 0.0193    | 69864.04          | 0.0176    | 69903.27          | 0.0206    |
| 69825.67          | 0.0202    | 69865.04          | 0.0192    | 69904.27          | 0.0203    |
| 69826.69          | 0.0221    | 69866.05          | 0.0233    | 69905.28          | 0.0201    |
| 69827.7           | 0.0221    | 69867.06          | 0.0253    | 69906.28          | 0.0181    |
| 69828.71          | 0.0230    | 69868.07          | 0.0305    | 69907.29          | 0.0169    |

Table S1. Continued

| VUV photon energy | Intensity | VUV photon energy | Intensity | VUV photon energy | Intensity |
|-------------------|-----------|-------------------|-----------|-------------------|-----------|
| 69908.29          | 0.0170    | 69947.37          | 0.0176    | 69986.31          | 0.0388    |
| 69909.29          | 0.0161    | 69948.37          | 0.0164    | 69987.31          | 0.0374    |
| 69910.3           | 0.0142    | 69949.37          | 0.0162    | 69988.31          | 0.0346    |
| 69911.3           | 0.0145    | 69950.37          | 0.0151    | 69989.3           | 0.0344    |
| 69912.3           | 0.0143    | 69951.37          | 0.0155    | 69990.3           | 0.0353    |
| 69913.31          | 0.0149    | 69952.37          | 0.0151    | 69991.3           | 0.0334    |
| 69914.31          | 0.0150    | 69953.37          | 0.0163    | 69992.29          | 0.0318    |
| 69915.31          | 0.0160    | 69954.37          | 0.0169    | 69993.29          | 0.0301    |
| 69916.32          | 0.0171    | 69955.37          | 0.0176    | 69994.29          | 0.0311    |
| 69917.32          | 0.0195    | 69956.37          | 0.0187    | 69995.28          | 0.0308    |
| 69918.32          | 0.0199    | 69957.37          | 0.0195    | 69996.28          | 0.0327    |
| 69919.33          | 0.0210    | 69958.37          | 0.0202    | 69997.27          | 0.0344    |
| 69920.33          | 0.0237    | 69959.37          | 0.0224    | 69998.27          | 0.0315    |
| 69921.33          | 0.0253    | 69960.37          | 0.0219    | 69999.27          | 0.0336    |
| 69922.33          | 0.0258    | 69961.37          | 0.0218    | 70000.26          | 0.0346    |
| 69923.34          | 0.0259    | 69962.37          | 0.0244    | 70001.26          | 0.0361    |
| 69924.34          | 0.0273    | 69963.36          | 0.0237    | 70002.25          | 0.0381    |
| 69925.34          | 0.0263    | 69964.36          | 0.0249    | 70003.25          | 0.0422    |
| 69926.34          | 0.0273    | 69965.36          | 0.0257    | 70004.24          | 0.0423    |
| 69927.35          | 0.0252    | 69966.36          | 0.0229    | 70005.24          | 0.0430    |
| 69928.35          | 0.0255    | 69967.36          | 0.0211    | 70006.23          | 0.0430    |
| 69929.35          | 0.0264    | 69968.36          | 0.0207    | 70007.23          | 0.0406    |
| 69930.35          | 0.0250    | 69969.36          | 0.0204    | 70008.22          | 0.0365    |
| 69931.35          | 0.0246    | 69970.35          | 0.0202    | 70009.22          | 0.0342    |
| 69932.36          | 0.0250    | 69971.35          | 0.0209    | 70010.21          | 0.0312    |
| 69933.36          | 0.0250    | 69972.35          | 0.0201    | 70011.21          | 0.0278    |
| 69934.36          | 0.0233    | 69973.35          | 0.0199    | 70012.2           | 0.0251    |
| 69935.36          | 0.0226    | 69974.35          | 0.0192    | 70013.2           | 0.0231    |
| 69936.36          | 0.0237    | 69975.34          | 0.0194    | 70014.19          | 0.0221    |
| 69937.36          | 0.0225    | 69976.34          | 0.0205    | 70015.18          | 0.0191    |
| 69938.36          | 0.0221    | 69977.34          | 0.0224    | 70016.18          | 0.0199    |
| 69939.37          | 0.0233    | 69978.34          | 0.0224    | 70017.17          | 0.0183    |
| 69940.37          | 0.0238    | 69979.33          | 0.0238    | 70018.17          | 0.0179    |
| 69941.37          | 0.0220    | 69980.33          | 0.0242    | 70019.16          | 0.0166    |
| 69942.37          | 0.0203    | 69981.33          | 0.0276    | 70020.16          | 0.0189    |
| 69943.37          | 0.0190    | 69982.33          | 0.0296    | 70021.15          | 0.0197    |
| 69944.37          | 0.0195    | 69983.32          | 0.0327    | 70022.14          | 0.0180    |
| 69945.37          | 0.0188    | 69984.32          | 0.0355    | 70023.14          | 0.0187    |
| 69946.37          | 0.0177    | 69985.32          | 0.0376    | 70024.13          | 0.0187    |



Table S1. Continued

| VUV photon energy | Intensity | VUV photon energy | Intensity | VUV photon energy | Intensity |
|-------------------|-----------|-------------------|-----------|-------------------|-----------|
| 70025.12          | 0.0216    | 70063.8           | 0.1109    | 70102.34          | 0.0180    |
| 70026.12          | 0.0218    | 70064.79          | 0.1032    | 70103.32          | 0.0176    |
| 70027.11          | 0.0218    | 70065.78          | 0.0859    | 70104.31          | 0.0176    |
| 70028.1           | 0.0245    | 70066.77          | 0.0741    | 70105.3           | 0.0167    |
| 70029.1           | 0.0256    | 70067.76          | 0.0671    | 70106.28          | 0.0186    |
| 70030.09          | 0.0241    | 70068.75          | 0.0625    | 70107.27          | 0.0196    |
| 70031.08          | 0.0265    | 70069.73          | 0.0621    | 70108.25          | 0.0205    |
| 70032.07          | 0.0251    | 70070.72          | 0.0537    | 70109.24          | 0.0217    |
| 70033.07          | 0.0258    | 70071.71          | 0.0517    | 70110.23          | 0.0224    |
| 70034.06          | 0.0256    | 70072.7           | 0.0452    | 70111.21          | 0.0230    |
| 70035.05          | 0.0256    | 70073.69          | 0.0386    | 70112.2           | 0.0237    |
| 70036.04          | 0.0249    | 70074.68          | 0.0332    | 70113.18          | 0.0222    |
| 70037.04          | 0.0251    | 70075.67          | 0.0292    | 70114.17          | 0.0223    |
| 70038.03          | 0.0245    | 70076.66          | 0.0268    | 70115.15          | 0.0222    |
| 70039.02          | 0.0238    | 70077.65          | 0.0241    | 70116.14          | 0.0219    |
| 70040.01          | 0.0241    | 70078.64          | 0.0241    | 70117.12          | 0.0215    |
| 70041.01          | 0.0247    | 70079.62          | 0.0243    | 70118.11          | 0.0206    |
| 70042             | 0.0236    | 70080.61          | 0.0255    | 70119.09          | 0.0205    |
| 70042.99          | 0.0239    | 70081.6           | 0.0242    | 70120.08          | 0.0188    |
| 70043.98          | 0.0269    | 70082.59          | 0.0241    | 70121.06          | 0.0189    |
| 70044.97          | 0.0269    | 70083.58          | 0.0263    | 70122.05          | 0.0208    |
| 70045.96          | 0.0323    | 70084.57          | 0.0293    | 70123.03          | 0.0203    |
| 70046.96          | 0.0353    | 70085.55          | 0.0306    | 70124.02          | 0.0190    |
| 70047.95          | 0.0382    | 70086.54          | 0.0325    | 70125             | 0.0202    |
| 70048.94          | 0.0423    | 70087.53          | 0.0371    | 70125.99          | 0.0186    |
| 70049.93          | 0.0468    | 70088.52          | 0.0358    | 70126.97          | 0.0208    |
| 70050.92          | 0.0522    | 70089.5           | 0.0379    | 70127.96          | 0.0186    |
| 70051.91          | 0.0538    | 70090.49          | 0.0361    | 70128.94          | 0.0188    |
| 70052.9           | 0.0617    | 70091.48          | 0.0356    | 70129.92          | 0.0178    |
| 70053.89          | 0.0654    | 70092.47          | 0.0355    | 70130.91          | 0.0185    |
| 70054.88          | 0.0766    | 70093.45          | 0.0311    | 70131.89          | 0.0192    |
| 70055.87          | 0.0880    | 70094.44          | 0.0319    | 70132.88          | 0.0201    |
| 70056.87          | 0.1049    | 70095.43          | 0.0287    | 70133.86          | 0.0209    |
| 70057.86          | 0.1180    | 70096.42          | 0.0282    | 70134.84          | 0.0230    |
| 70058.85          | 0.1300    | 70097.4           | 0.0235    | 70135.83          | 0.0237    |
| 70059.84          | 0.1358    | 70098.39          | 0.0222    | 70136.81          | 0.0253    |
| 70060.83          | 0.1363    | 70099.38          | 0.0194    | 70137.79          | 0.0265    |
| 70061.82          | 0.1347    | 70100.36          | 0.0211    | 70138.78          | 0.0270    |
| 70062.81          | 0.1271    | 70101.35          | 0.0188    | 70139.76          | 0.0259    |

Table S1. Continued

| VUV photon energy | Intensity | VUV photon energy | Intensity | VUV photon energy | Intensity |
|-------------------|-----------|-------------------|-----------|-------------------|-----------|
| 70140.74          | 0.0269    | 70179.02          | 0.0180    | 70217.16          | 0.0418    |
| 70141.73          | 0.0272    | 70180             | 0.0175    | 70218.13          | 0.0431    |
| 70142.71          | 0.0270    | 70180.98          | 0.0182    | 70219.11          | 0.0442    |
| 70143.69          | 0.0268    | 70181.96          | 0.0199    | 70220.09          | 0.0537    |
| 70144.67          | 0.0255    | 70182.93          | 0.0194    | 70221.06          | 0.0572    |
| 70145.66          | 0.0255    | 70183.91          | 0.0214    | 70222.04          | 0.0683    |
| 70146.64          | 0.0250    | 70184.89          | 0.0215    | 70223.01          | 0.0746    |
| 70147.62          | 0.0269    | 70185.87          | 0.0229    | 70223.99          | 0.0794    |
| 70148.6           | 0.0273    | 70186.85          | 0.0230    | 70224.97          | 0.0846    |
| 70149.59          | 0.0278    | 70187.83          | 0.0246    | 70225.94          | 0.0807    |
| 70150.57          | 0.0277    | 70188.81          | 0.0235    | 70226.92          | 0.0818    |
| 70151.55          | 0.0298    | 70189.79          | 0.0257    | 70227.89          | 0.0778    |
| 70152.53          | 0.0279    | 70190.77          | 0.0223    | 70228.87          | 0.0699    |
| 70153.52          | 0.0291    | 70191.75          | 0.0217    | 70229.84          | 0.0625    |
| 70154.5           | 0.0307    | 70192.72          | 0.0216    | 70230.82          | 0.0577    |
| 70155.48          | 0.0293    | 70193.7           | 0.0232    | 70231.79          | 0.0496    |
| 70156.46          | 0.0291    | 70194.68          | 0.0229    | 70232.77          | 0.0453    |
| 70157.44          | 0.0292    | 70195.66          | 0.0245    | 70233.74          | 0.0460    |
| 70158.42          | 0.0263    | 70196.64          | 0.0225    | 70234.72          | 0.0424    |
| 70159.41          | 0.0266    | 70197.62          | 0.0213    | 70235.69          | 0.0394    |
| 70160.39          | 0.0253    | 70198.59          | 0.0190    | 70236.67          | 0.0374    |
| 70161.37          | 0.0259    | 70199.57          | 0.0214    | 70237.64          | 0.0309    |
| 70162.35          | 0.0247    | 70200.55          | 0.0213    | 70238.62          | 0.0295    |
| 70163.33          | 0.0267    | 70201.53          | 0.0211    | 70239.59          | 0.0286    |
| 70164.31          | 0.0273    | 70202.5           | 0.0207    | 70240.57          | 0.0291    |
| 70165.29          | 0.0249    | 70203.48          | 0.0208    | 70241.54          | 0.0321    |
| 70166.27          | 0.0264    | 70204.46          | 0.0208    | 70242.51          | 0.0314    |
| 70167.25          | 0.0265    | 70205.44          | 0.0218    | 70243.49          | 0.0337    |
| 70168.23          | 0.0266    | 70206.41          | 0.0222    | 70244.46          | 0.0344    |
| 70169.22          | 0.0243    | 70207.39          | 0.0235    | 70245.44          | 0.0382    |
| 70170.2           | 0.0240    | 70208.37          | 0.0250    | 70246.41          | 0.0405    |
| 70171.18          | 0.0236    | 70209.35          | 0.0270    | 70247.38          | 0.0422    |
| 70172.16          | 0.0216    | 70210.32          | 0.0262    | 70248.36          | 0.0462    |
| 70173.14          | 0.0199    | 70211.3           | 0.0284    | 70249.33          | 0.0503    |
| 70174.12          | 0.0194    | 70212.28          | 0.0292    | 70250.3           | 0.0540    |
| 70175.1           | 0.0172    | 70213.25          | 0.0293    | 70251.28          | 0.0613    |
| 70176.08          | 0.0187    | 70214.23          | 0.0325    | 70252.25          | 0.0617    |
| 70177.06          | 0.0171    | 70215.21          | 0.0355    | 70253.22          | 0.0749    |
| 70178.04          | 0.0182    | 70216.18          | 0.0361    | 70254.2           | 0.0830    |

Table S1. Continued

| VUV photon energy | Intensity | VUV photon energy | Intensity | VUV photon energy | Intensity |
|-------------------|-----------|-------------------|-----------|-------------------|-----------|
| 70255.17          | 0.0926    | 70293.05          | 0.0182    | 70330.8           | 0.0233    |
| 70256.14          | 0.0929    | 70294.02          | 0.0196    | 70331.77          | 0.0214    |
| 70257.12          | 0.0918    | 70294.99          | 0.0201    | 70332.73          | 0.0226    |
| 70258.09          | 0.0860    | 70295.96          | 0.0213    | 70333.7           | 0.0217    |
| 70259.06          | 0.0843    | 70296.93          | 0.0226    | 70334.66          | 0.0212    |
| 70260.03          | 0.0741    | 70297.9           | 0.0225    | 70335.63          | 0.0189    |
| 70261.01          | 0.0618    | 70298.87          | 0.0227    | 70336.6           | 0.0123    |
| 70261.98          | 0.0494    | 70299.83          | 0.0249    | 70337.56          | 0.0065    |
| 70262.95          | 0.0437    | 70300.8           | 0.0258    | 70338.53          | 0.0166    |
| 70263.92          | 0.0353    | 70301.77          | 0.0253    | 70339.49          | 0.0160    |
| 70264.89          | 0.0312    | 70302.74          | 0.0247    | 70340.46          | 0.0118    |
| 70265.87          | 0.0295    | 70303.71          | 0.0252    | 70341.42          | 0.0167    |
| 70266.84          | 0.0257    | 70304.68          | 0.0270    | 70342.39          | 0.0183    |
| 70267.81          | 0.0245    | 70305.65          | 0.0244    | 70343.35          | 0.0218    |
| 70268.78          | 0.0260    | 70306.62          | 0.0246    | 70344.32          | 0.0213    |
| 70269.75          | 0.0247    | 70307.58          | 0.0309    | 70345.28          | 0.0203    |
| 70270.73          | 0.0231    | 70308.55          | 0.0301    | 70346.25          | 0.0216    |
| 70271.7           | 0.0230    | 70309.52          | 0.0243    | 70347.21          | 0.0225    |
| 70272.67          | 0.0248    | 70310.49          | 0.0306    | 70348.18          | 0.0225    |
| 70273.64          | 0.0268    | 70311.46          | 0.0351    | 70349.14          | 0.0206    |
| 70274.61          | 0.0256    | 70312.42          | 0.0393    | 70350.11          | 0.0208    |
| 70275.58          | 0.0232    | 70313.39          | 0.0391    |                   |           |
| 70276.55          | 0.0218    | 70314.36          | 0.0399    |                   |           |
| 70277.52          | 0.0229    | 70315.33          | 0.0406    |                   |           |
| 70278.5           | 0.0228    | 70316.3           | 0.0397    |                   |           |
| 70279.47          | 0.0223    | 70317.26          | 0.0424    |                   |           |
| 70280.44          | 0.0214    | 70318.23          | 0.0418    |                   |           |
| 70281.41          | 0.0205    | 70319.2           | 0.0447    |                   |           |
| 70282.38          | 0.0197    | 70320.17          | 0.0481    |                   |           |
| 70283.35          | 0.0219    | 70321.13          | 0.0469    |                   |           |
| 70284.32          | 0.0217    | 70322.1           | 0.0337    |                   |           |
| 70285.29          | 0.0208    | 70323.07          | 0.0453    |                   |           |
| 70286.26          | 0.0206    | 70324.03          | 0.0443    |                   |           |
| 70287.23          | 0.0223    | 70325             | 0.0354    |                   |           |
| 70288.2           | 0.0218    | 70325.97          | 0.0327    |                   |           |
| 70289.17          | 0.0148    | 70326.93          | 0.0295    |                   |           |
| 70290.14          | 0.0232    | 70327.9           | 0.0281    |                   |           |
| 70291.11          | 0.0217    | 70328.87          | 0.0259    |                   |           |
| 70292.08          | 0.0203    | 70329.83          | 0.0250    |                   |           |
