# Supplementary figures and images for: Conformational potential energy surfaces and cationic structure of 3,4-dihydro-2H-pyran by VUV-MATI spectroscopy and Franck–Condon fitting
Source: Royal Society of Chemistry journal article supplement (doi:10.1039/d0cp05193d), 2020-01-01

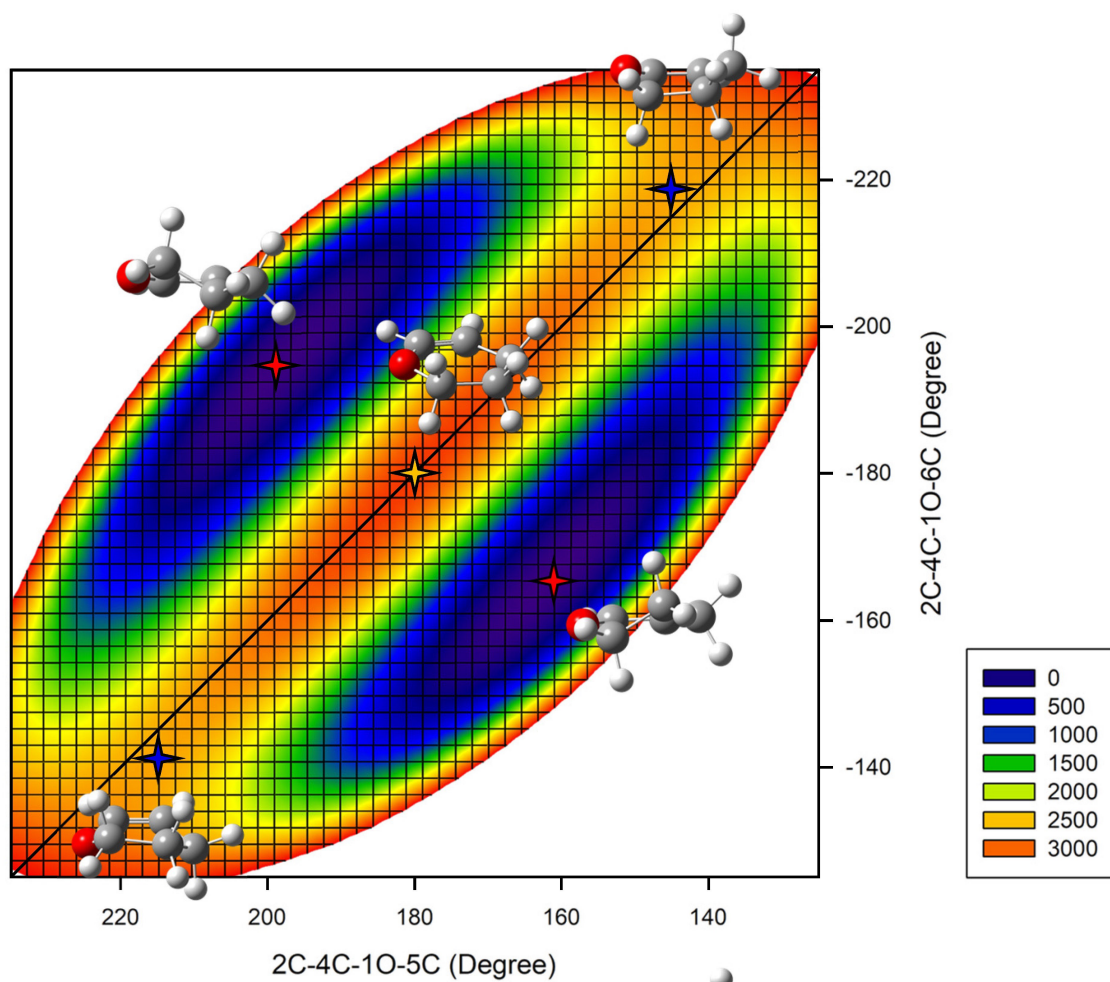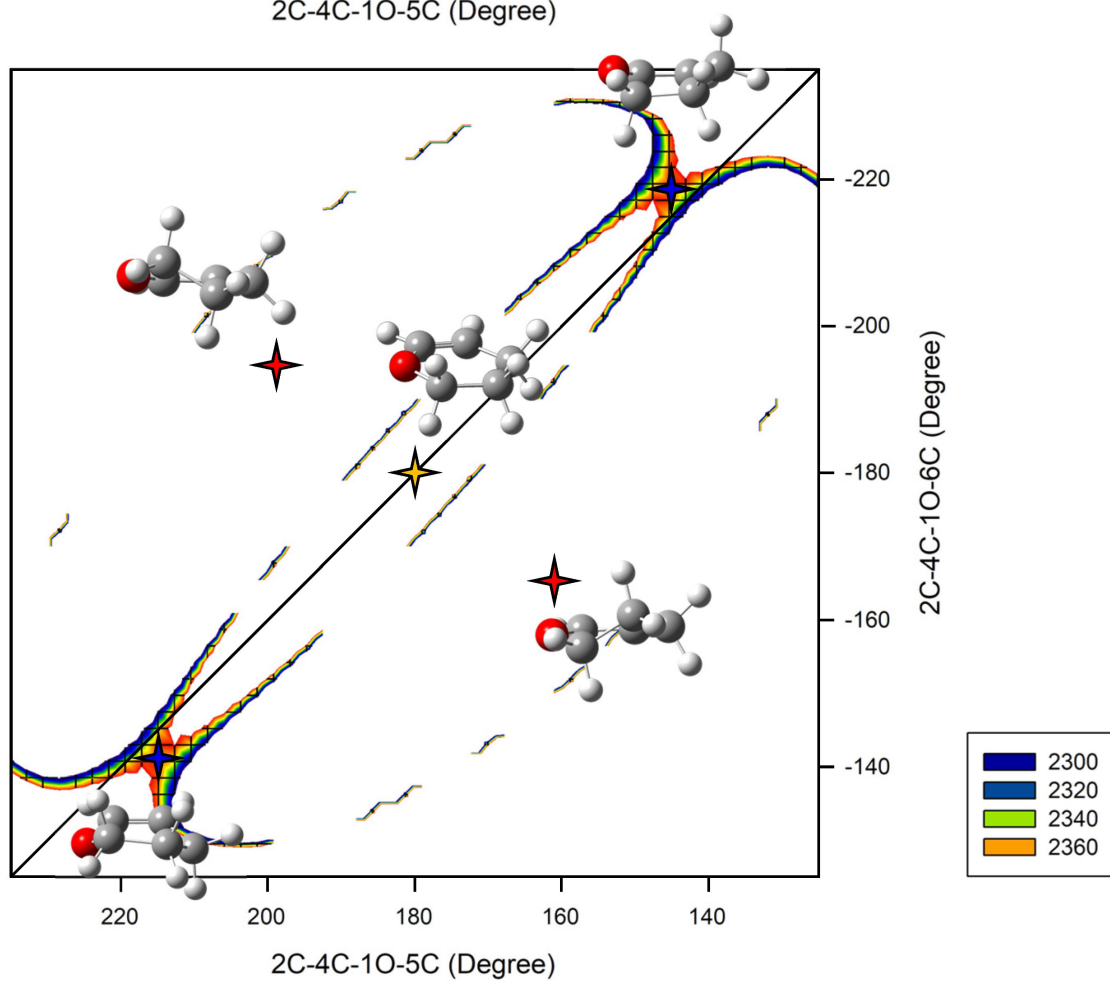

Supplement: d0cp05193d2.pdf [file d0cp05193d2.pdf]
